# Supplementary material
Source: MDPI journal article supplement (https://www.mdpi.com/2073-4433/13/3/414)
Supplement: s1 [file s1]

Archive with 23 entries (23 files):
- CAPTIONS_figs_suplementar.pdf
- Figure S1.PNG
- Figure S10.PNG
- Figure S11.PNG
- Figure S12.PNG
- Figure S13.PNG
- Figure S14.PNG
- Figure S15.PNG
- Figure S16.PNG
- Figure S17.PNG
- Figure S18.PNG
- Figure S19.png
- Figure S2.PNG
- Figure S20.PNG
- Figure S21.png
- Figure S22.PNG
- Figure S23.PNG
- Figure S3.PNG
- Figure S4.PNG
- Figure S6.png
- Figure S7.PNG
- Figure S8.PNG
- Figure S9.PNG
