# Supplementary material
Source: MDPI journal article supplement (https://www.mdpi.com/2073-4433/13/3/414)

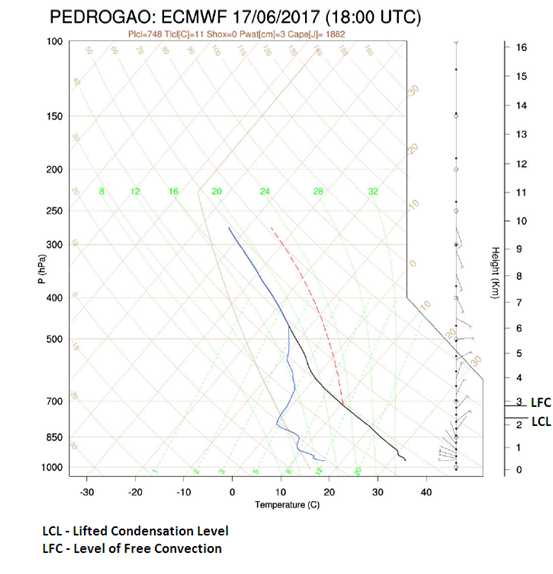

Supplement: s1 [file s1 › Figure S1.PNG]

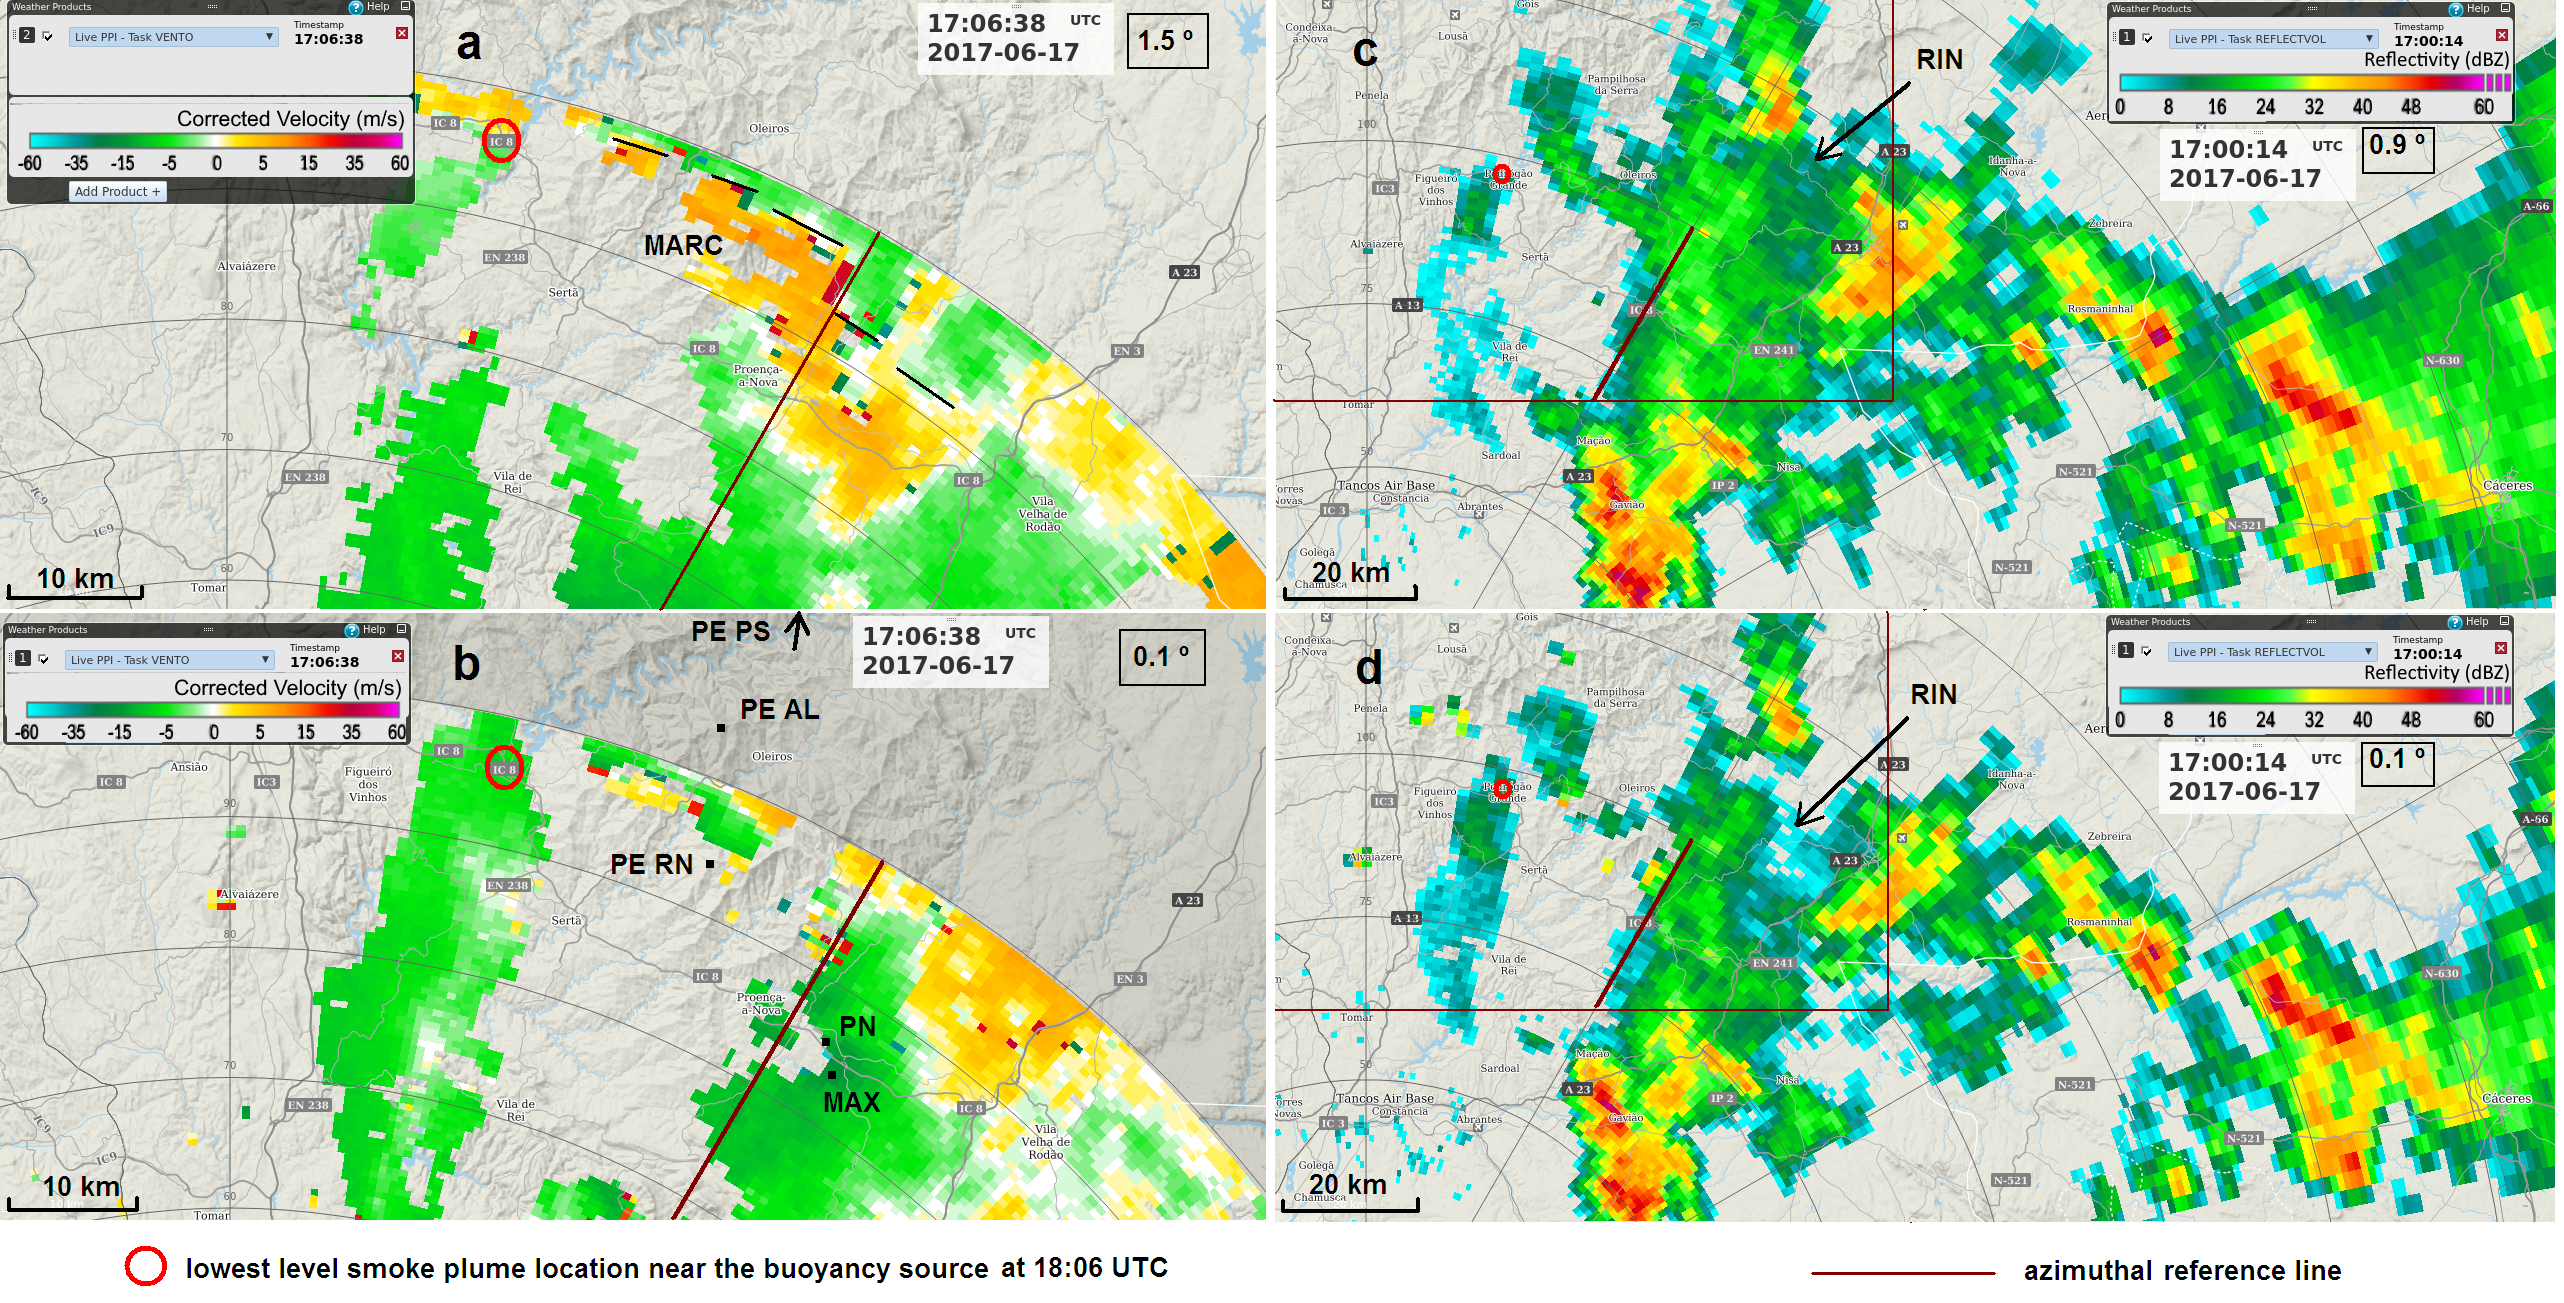

Supplement: s1 [file s1 › Figure S10.PNG]

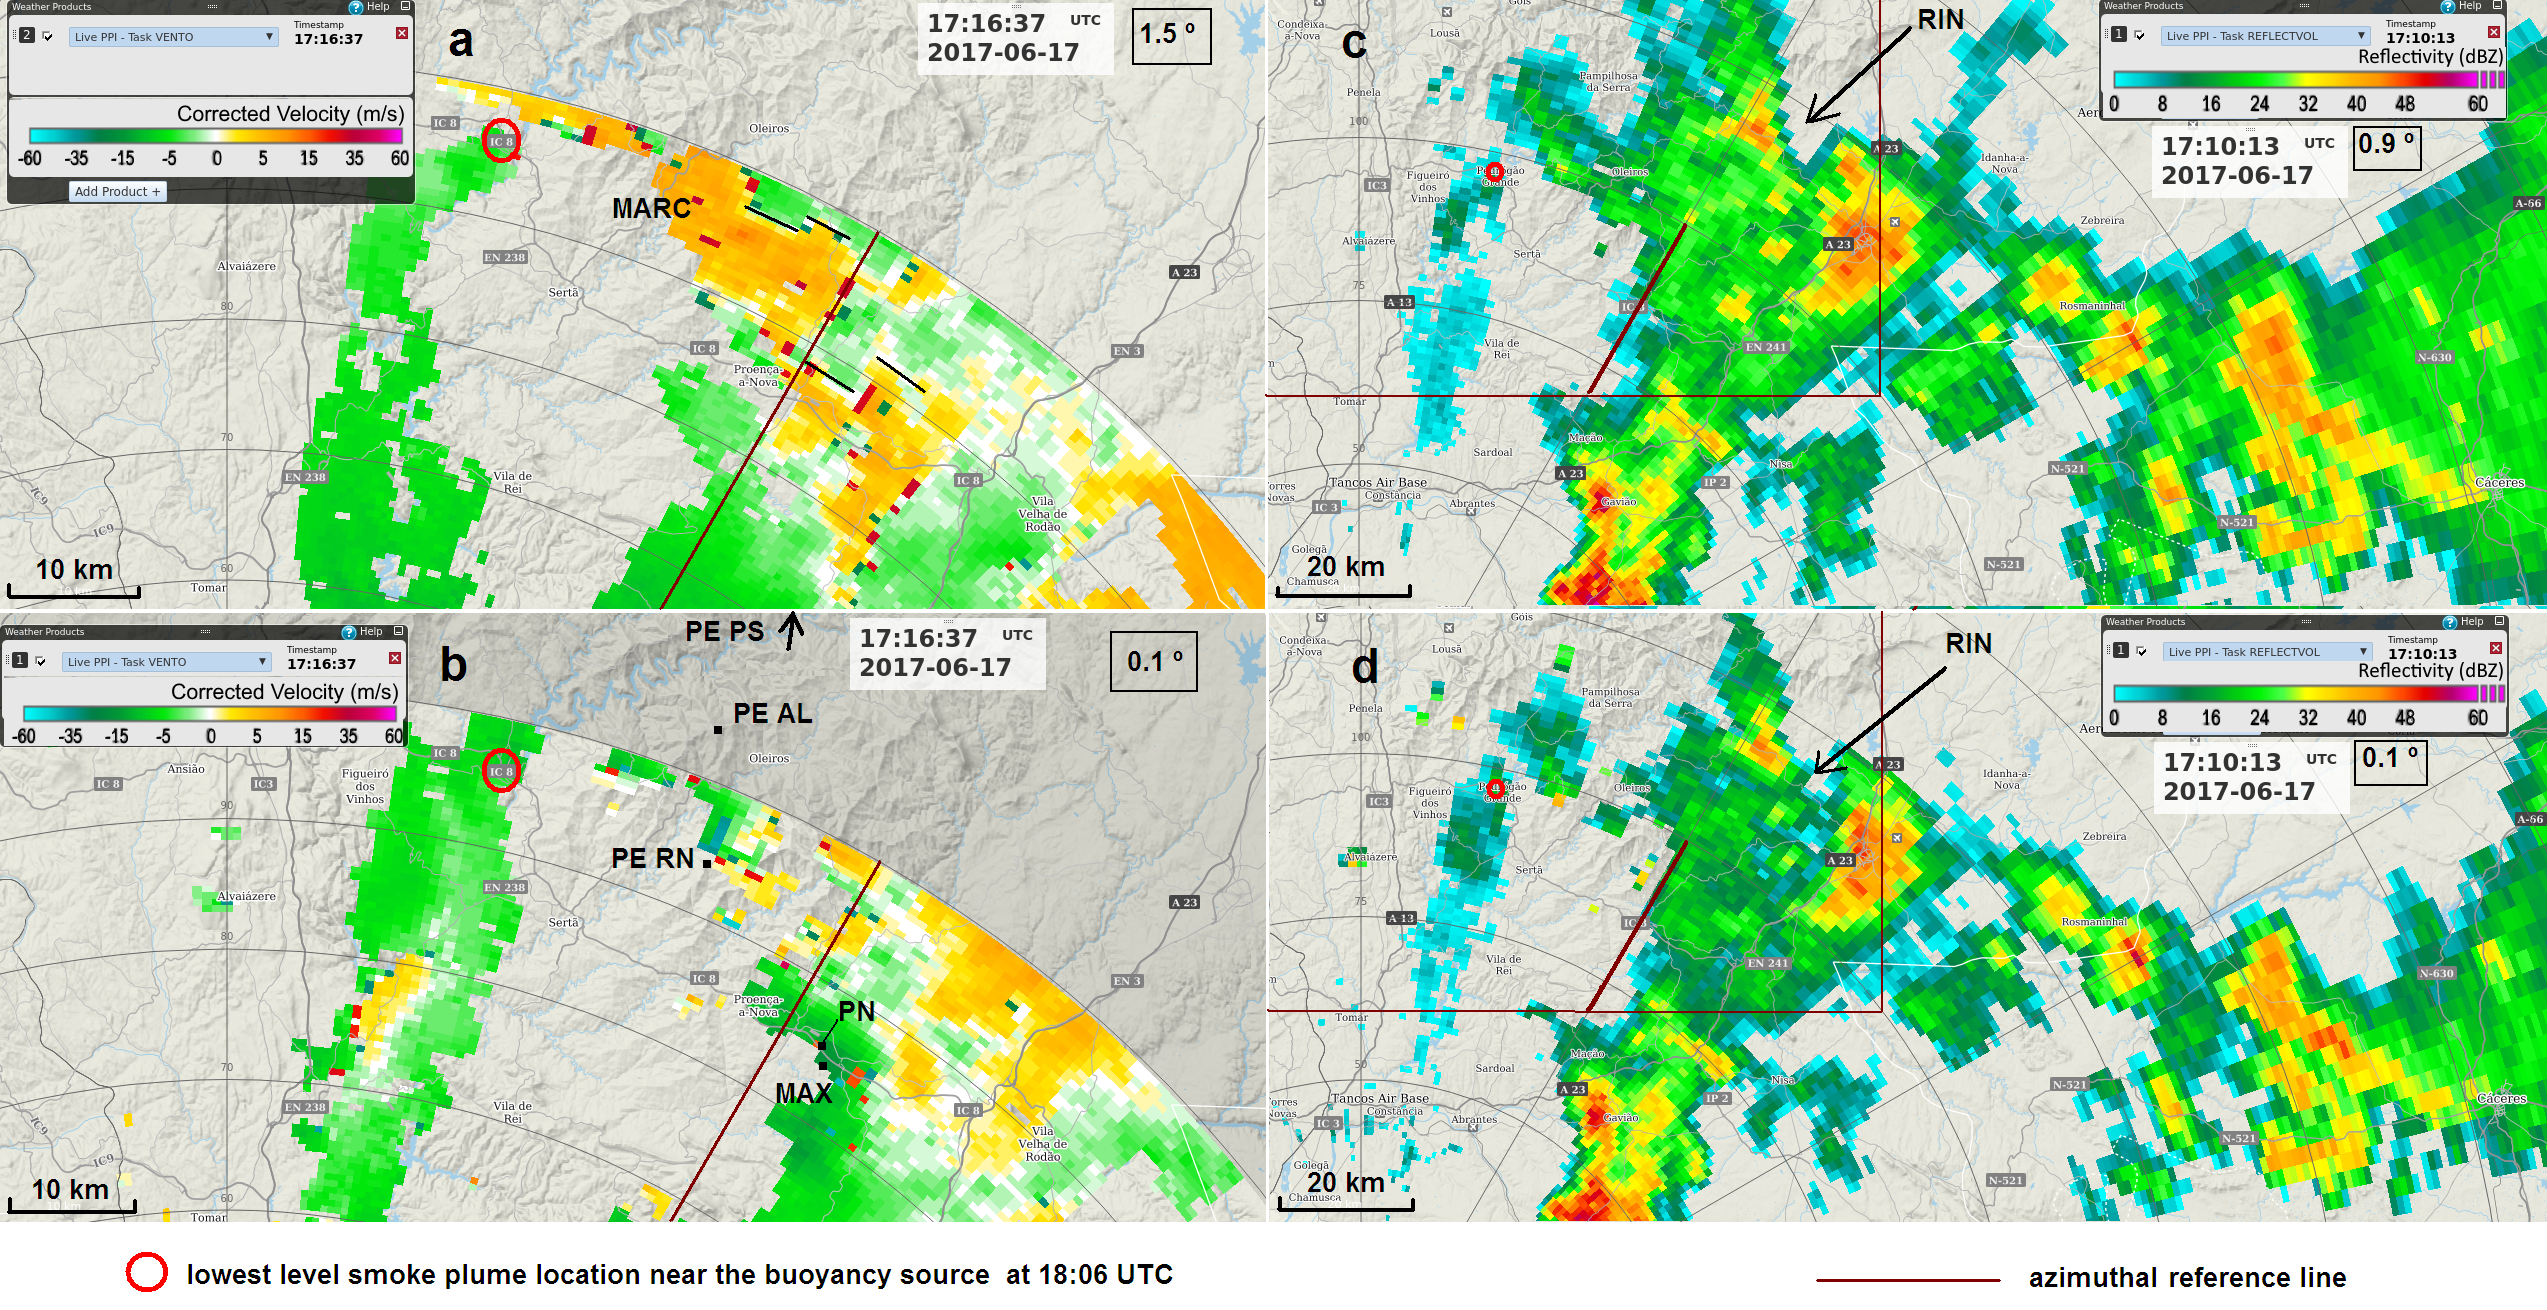

Supplement: s1 [file s1 › Figure S11.PNG]

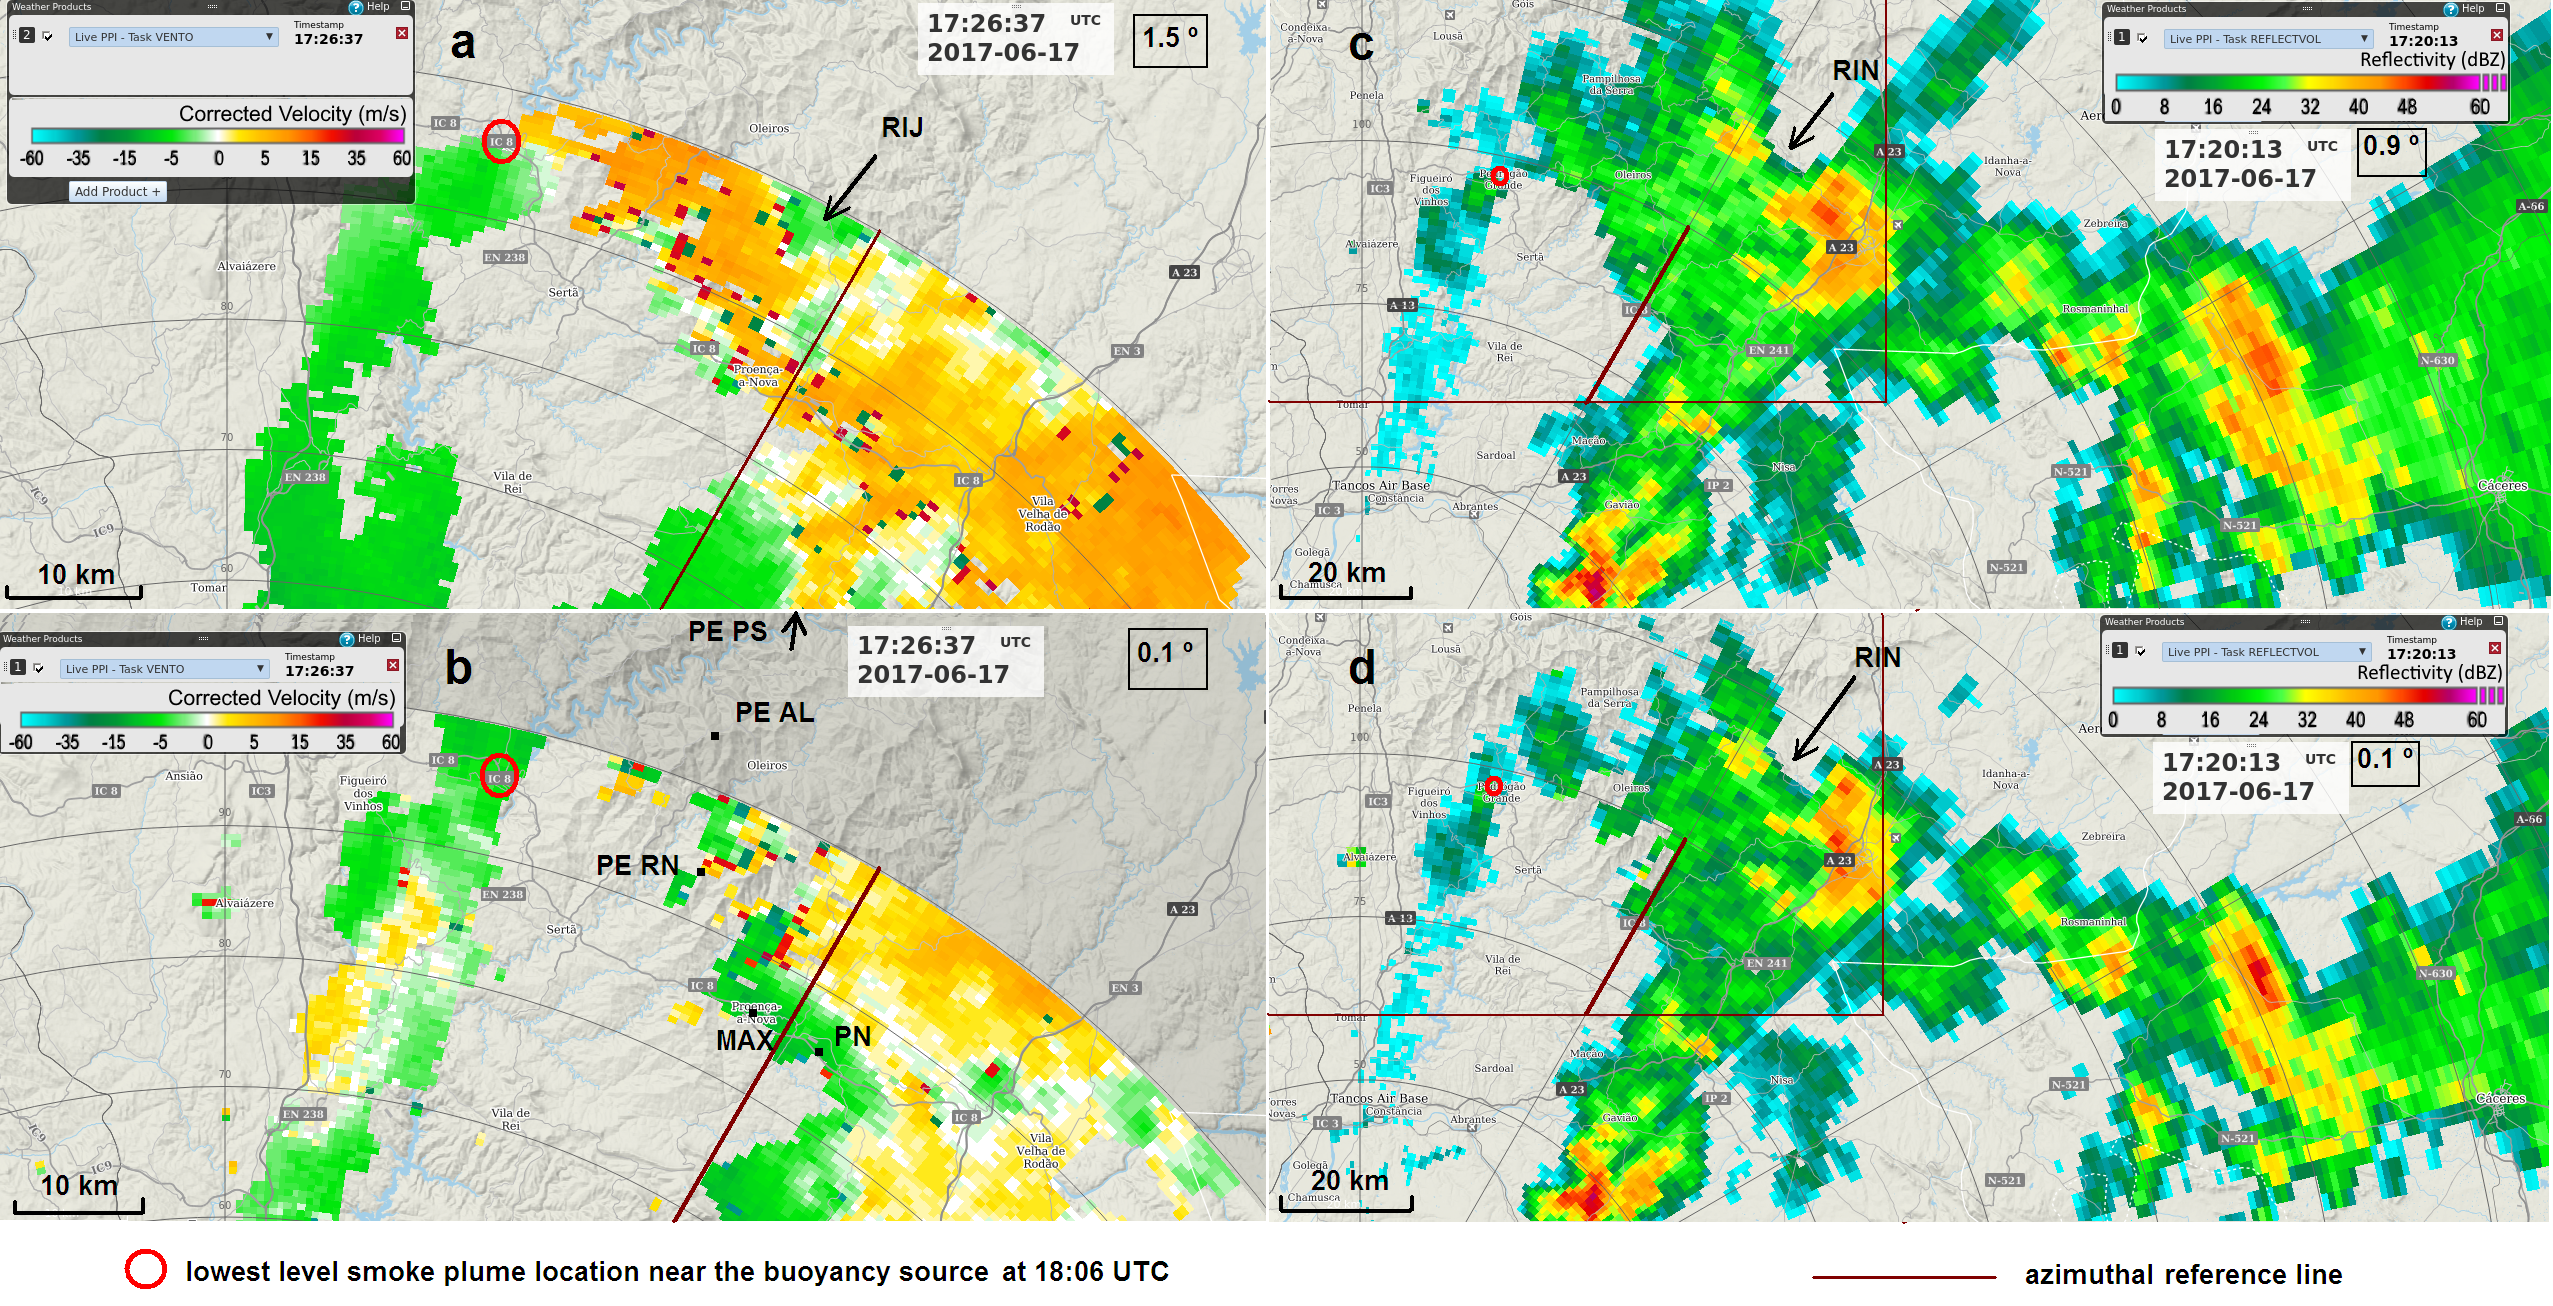

Supplement: s1 [file s1 › Figure S12.PNG]

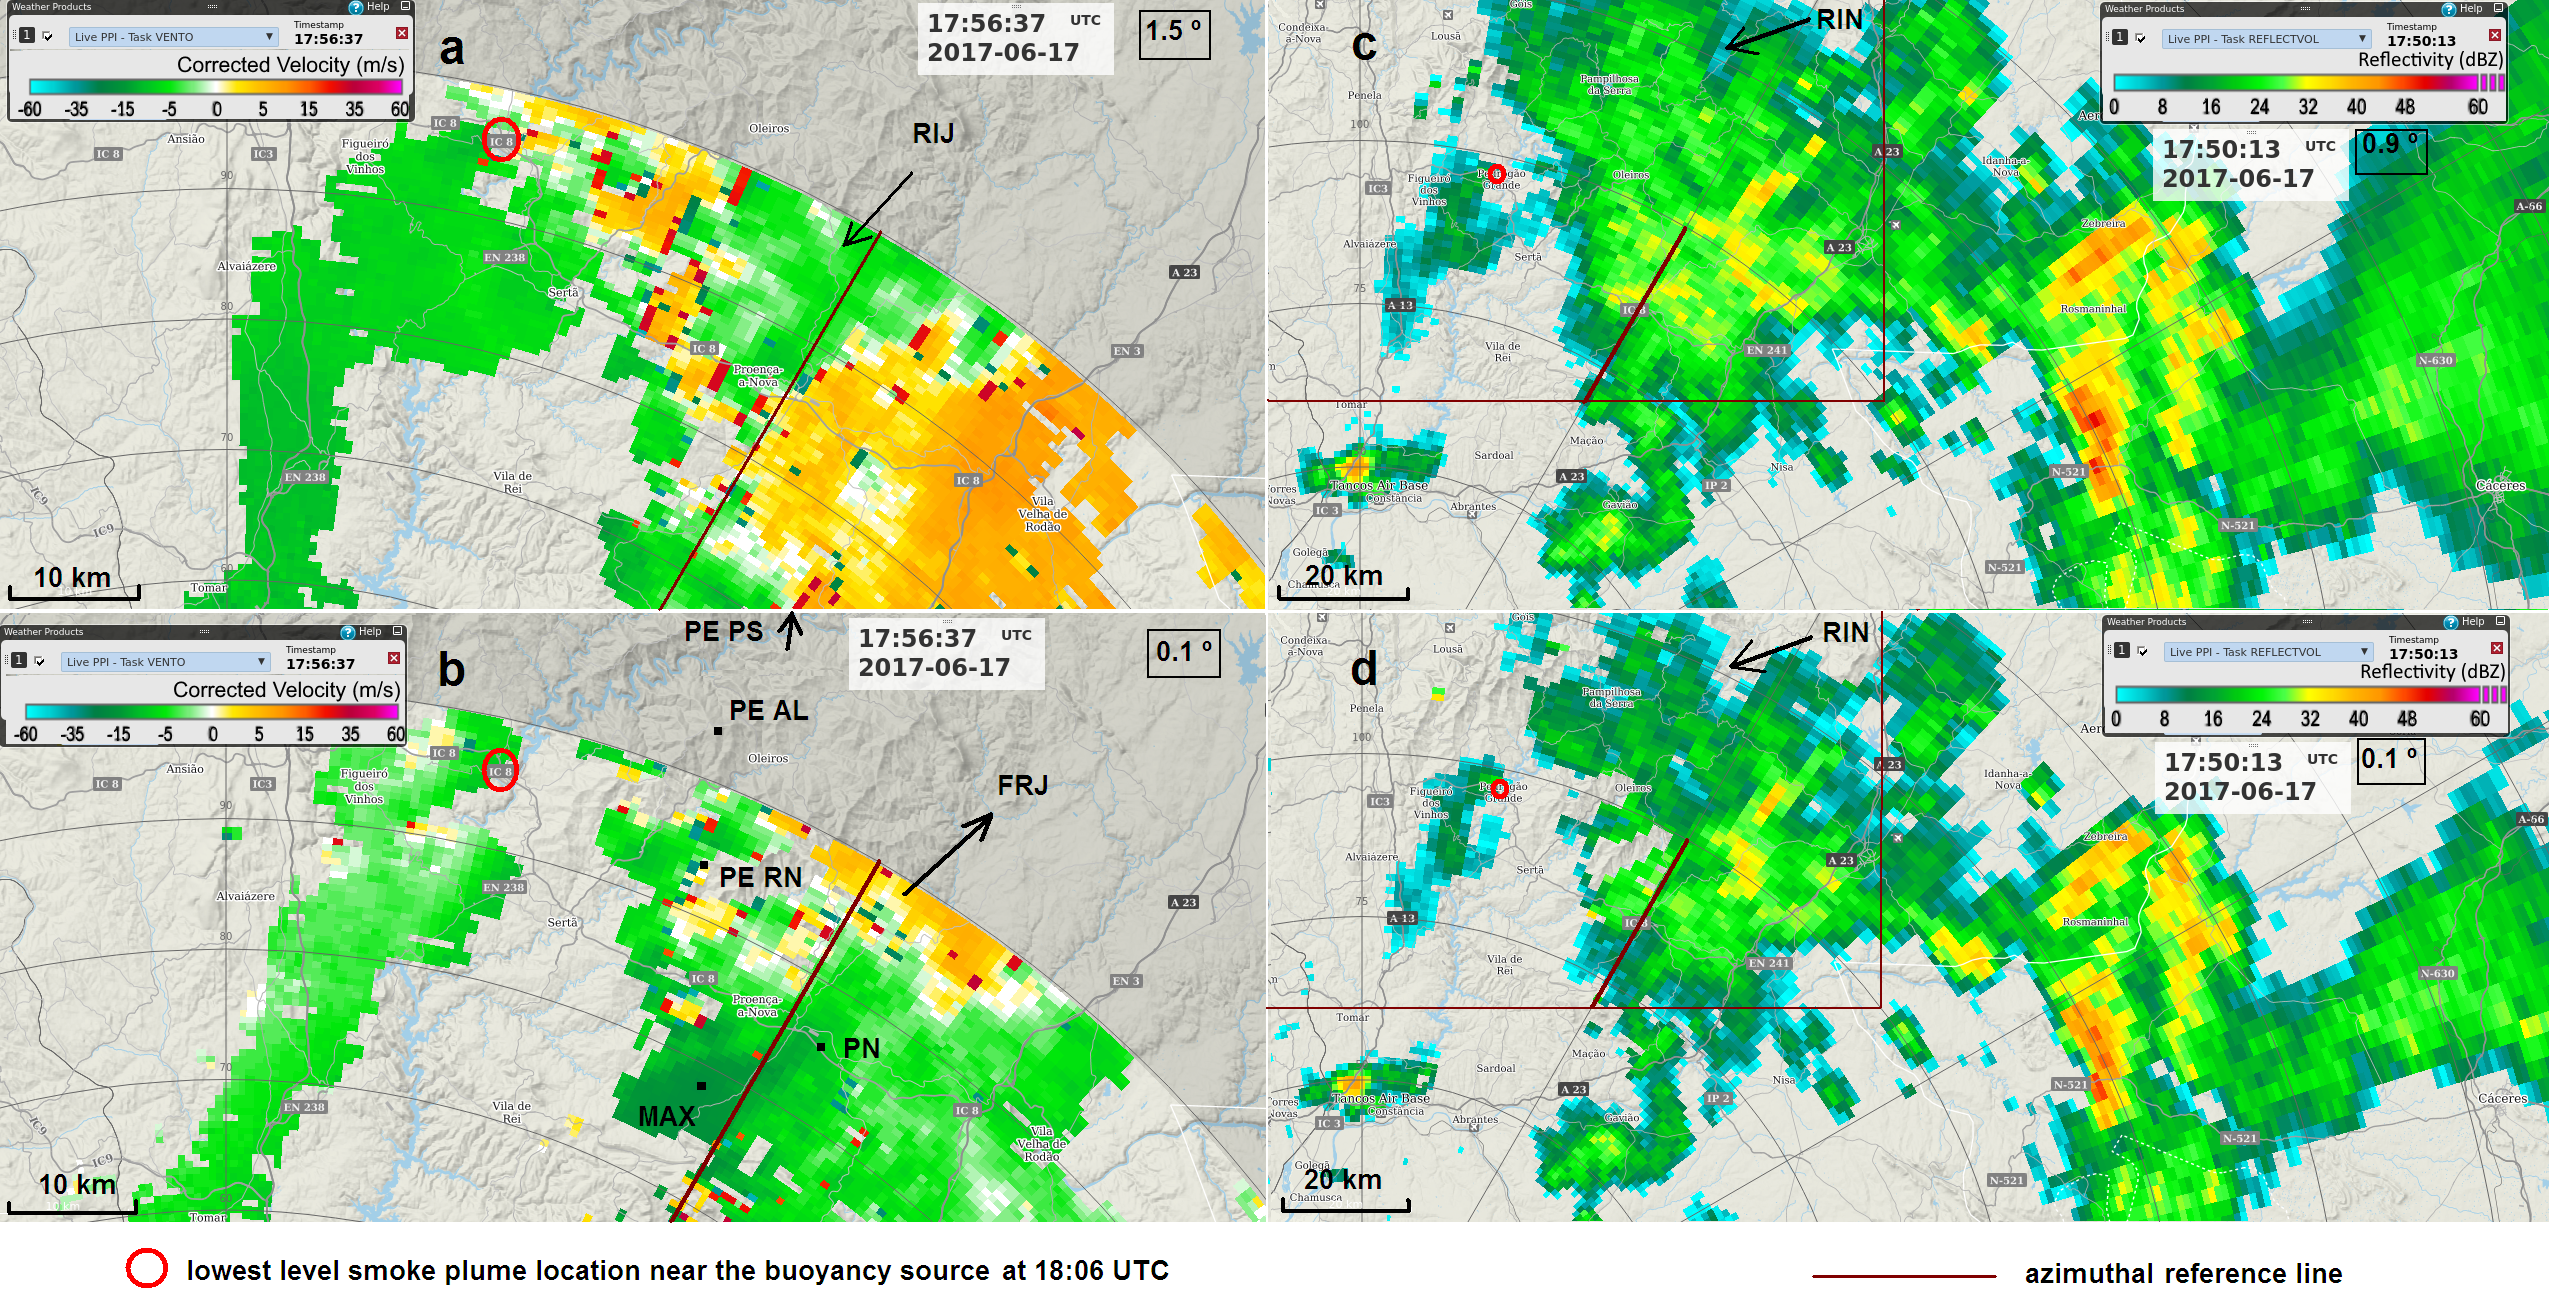

Supplement: s1 [file s1 › Figure S13.PNG]

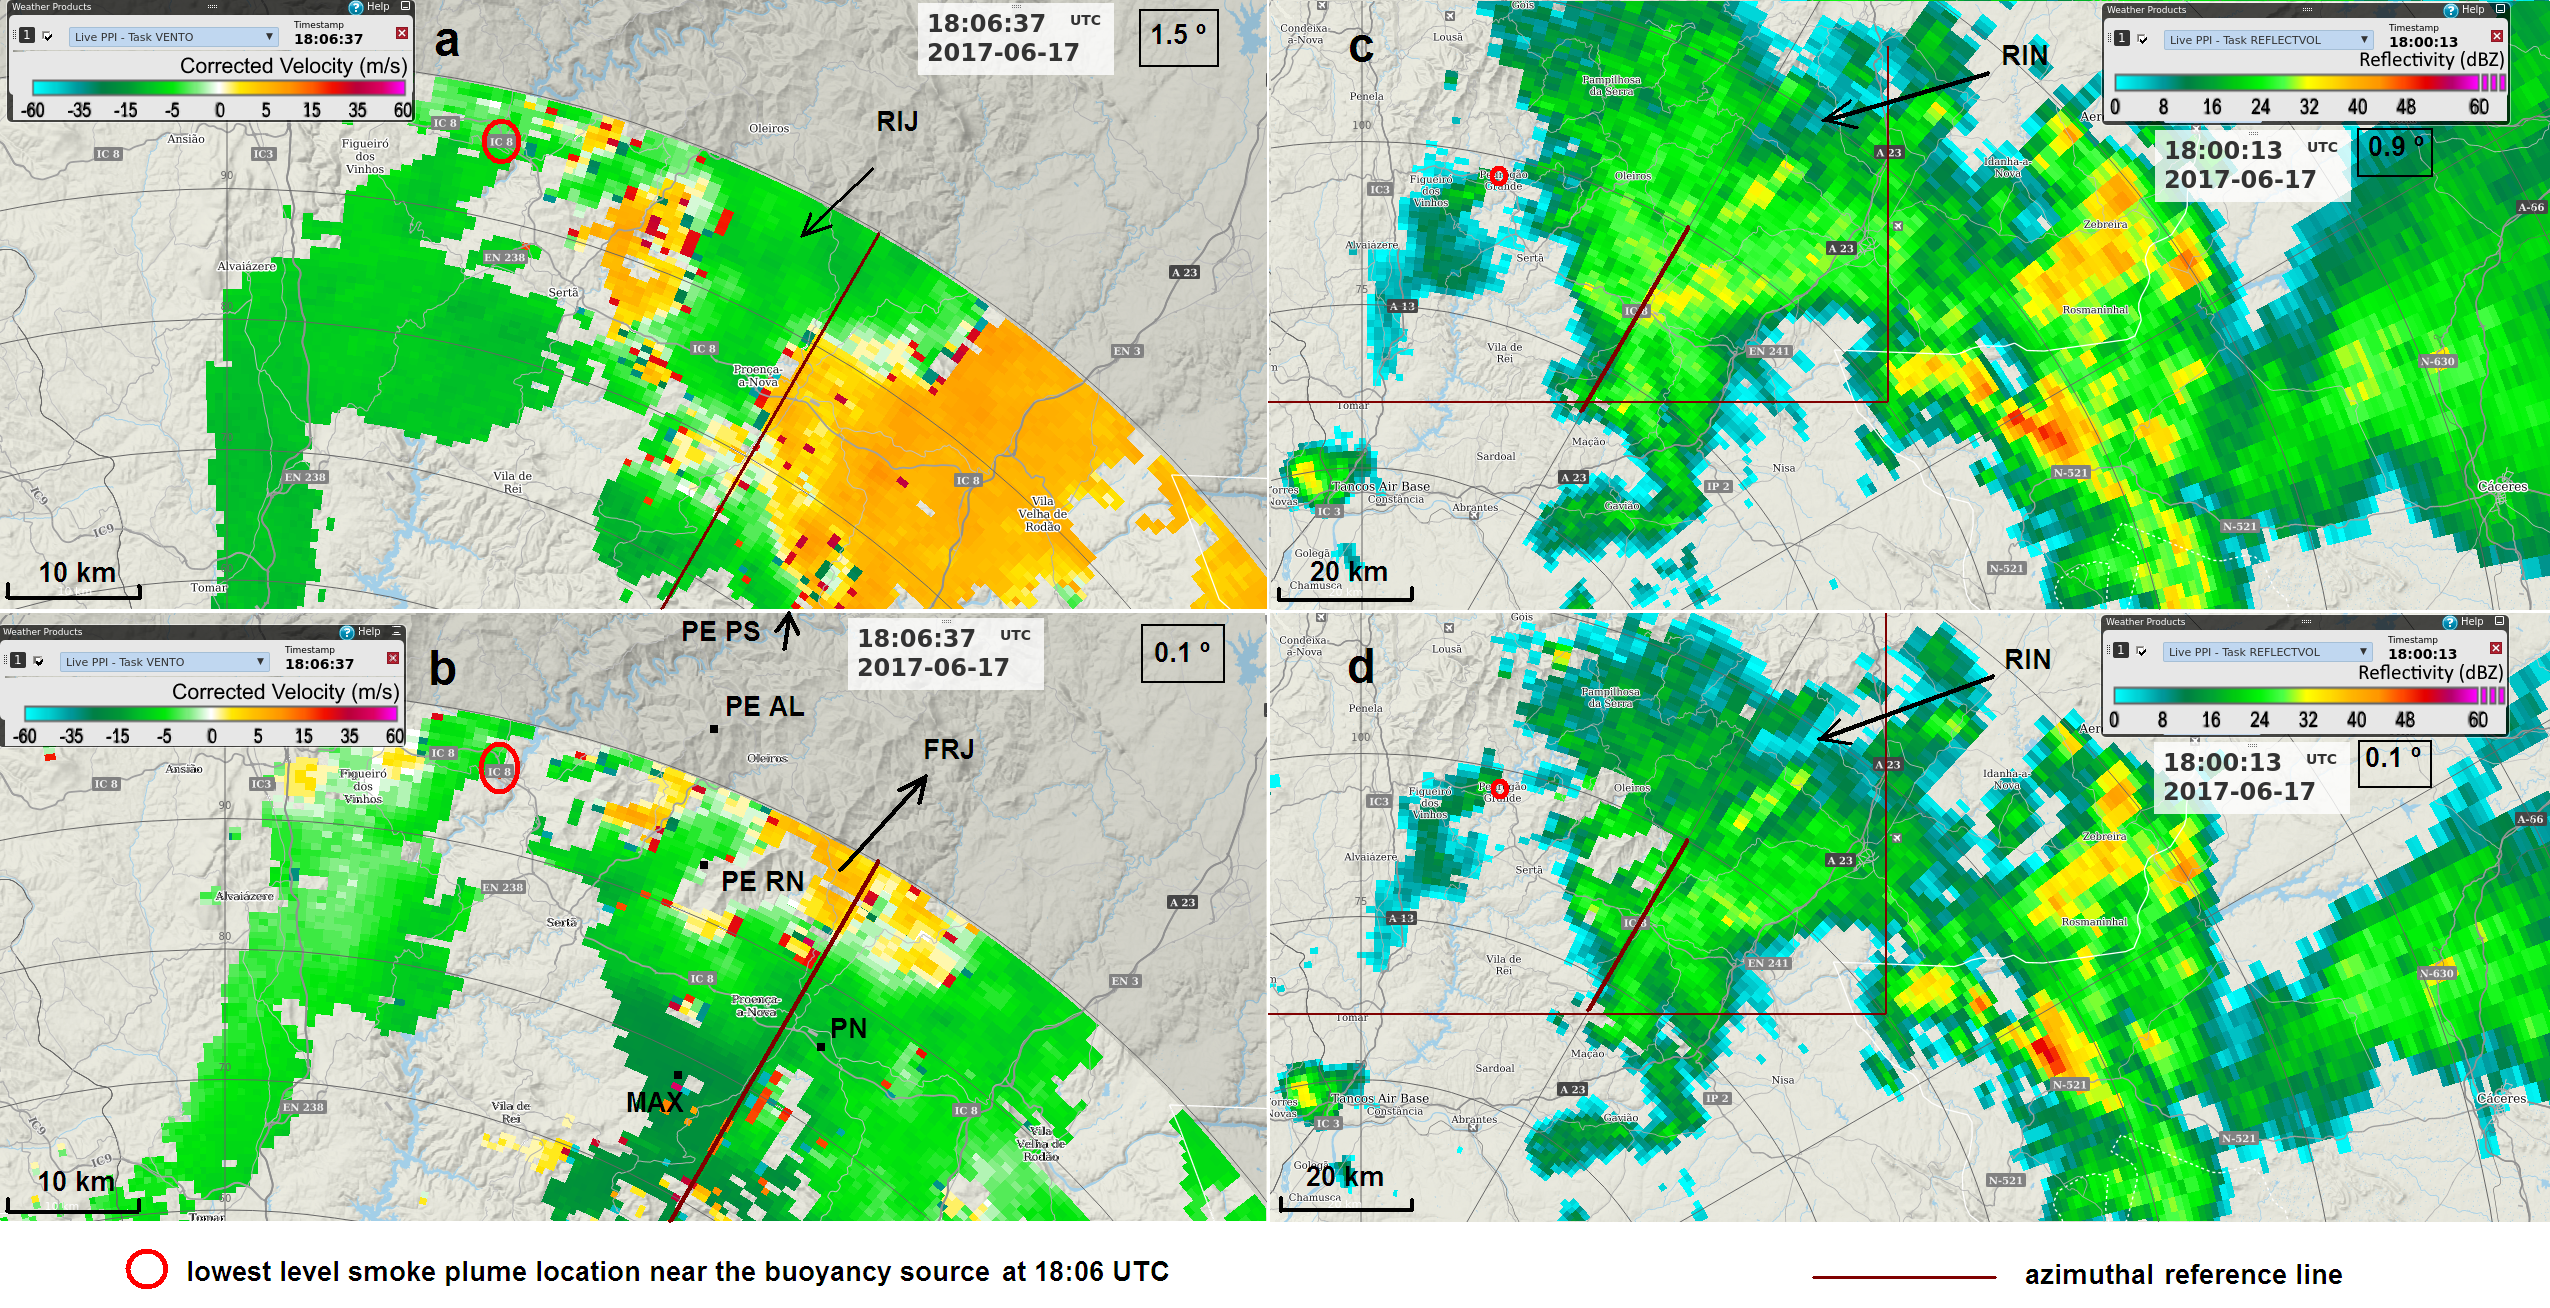

Supplement: s1 [file s1 › Figure S14.PNG]

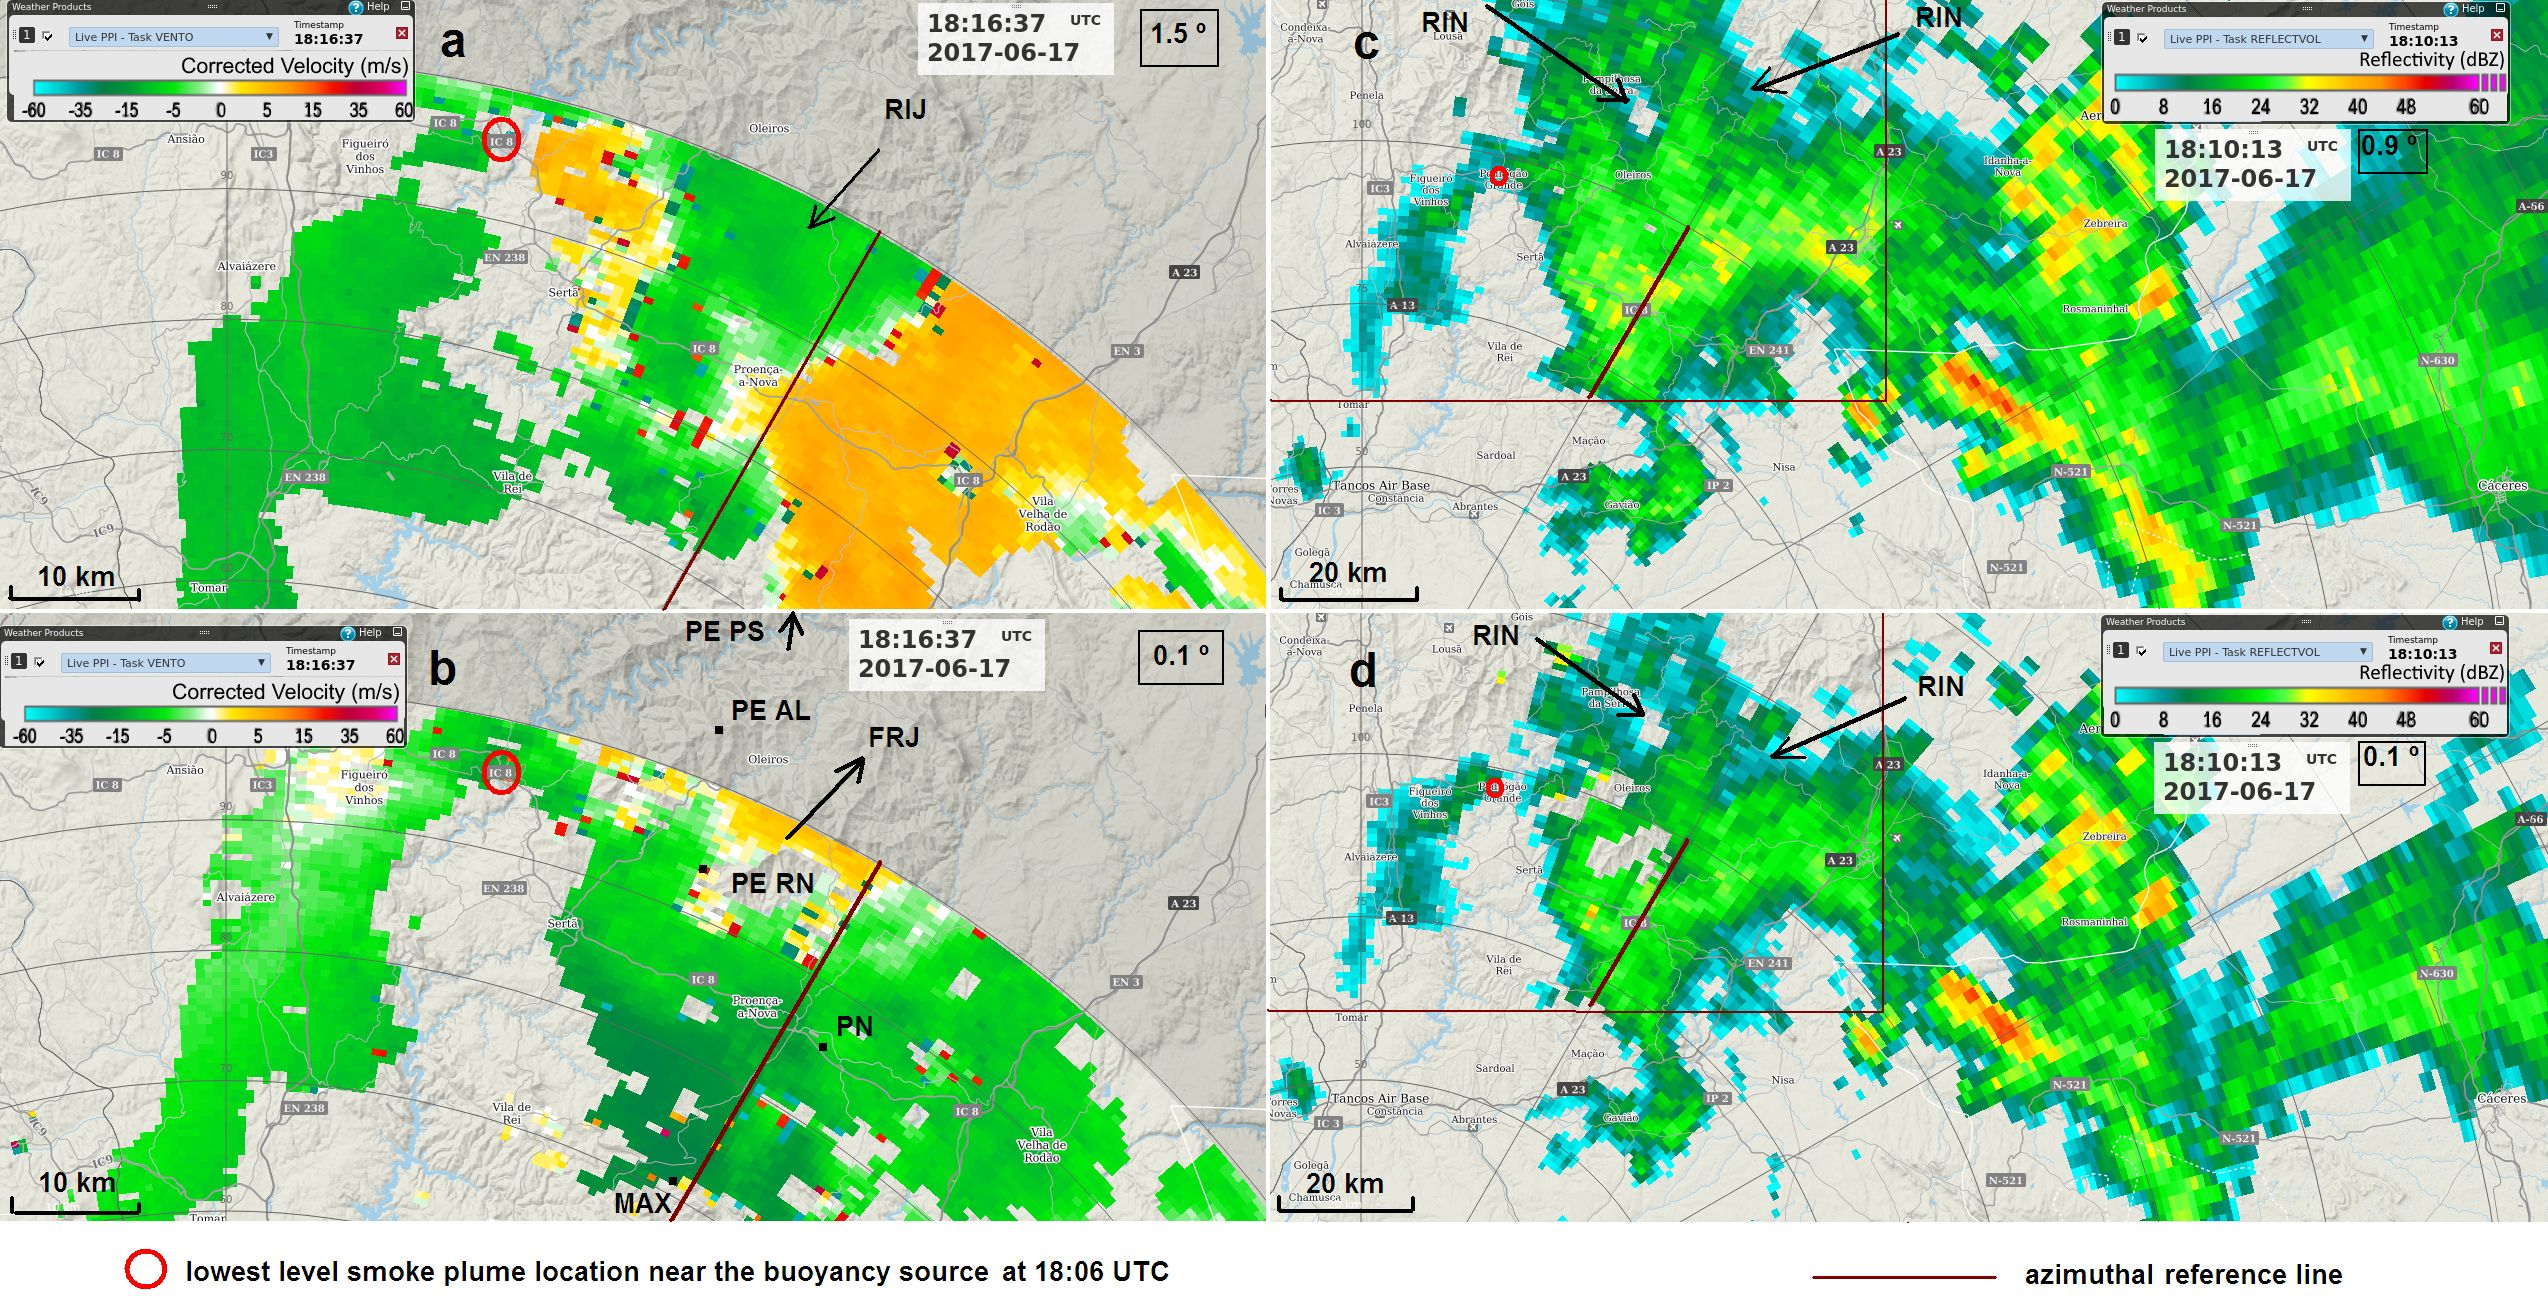

Supplement: s1 [file s1 › Figure S15.PNG]

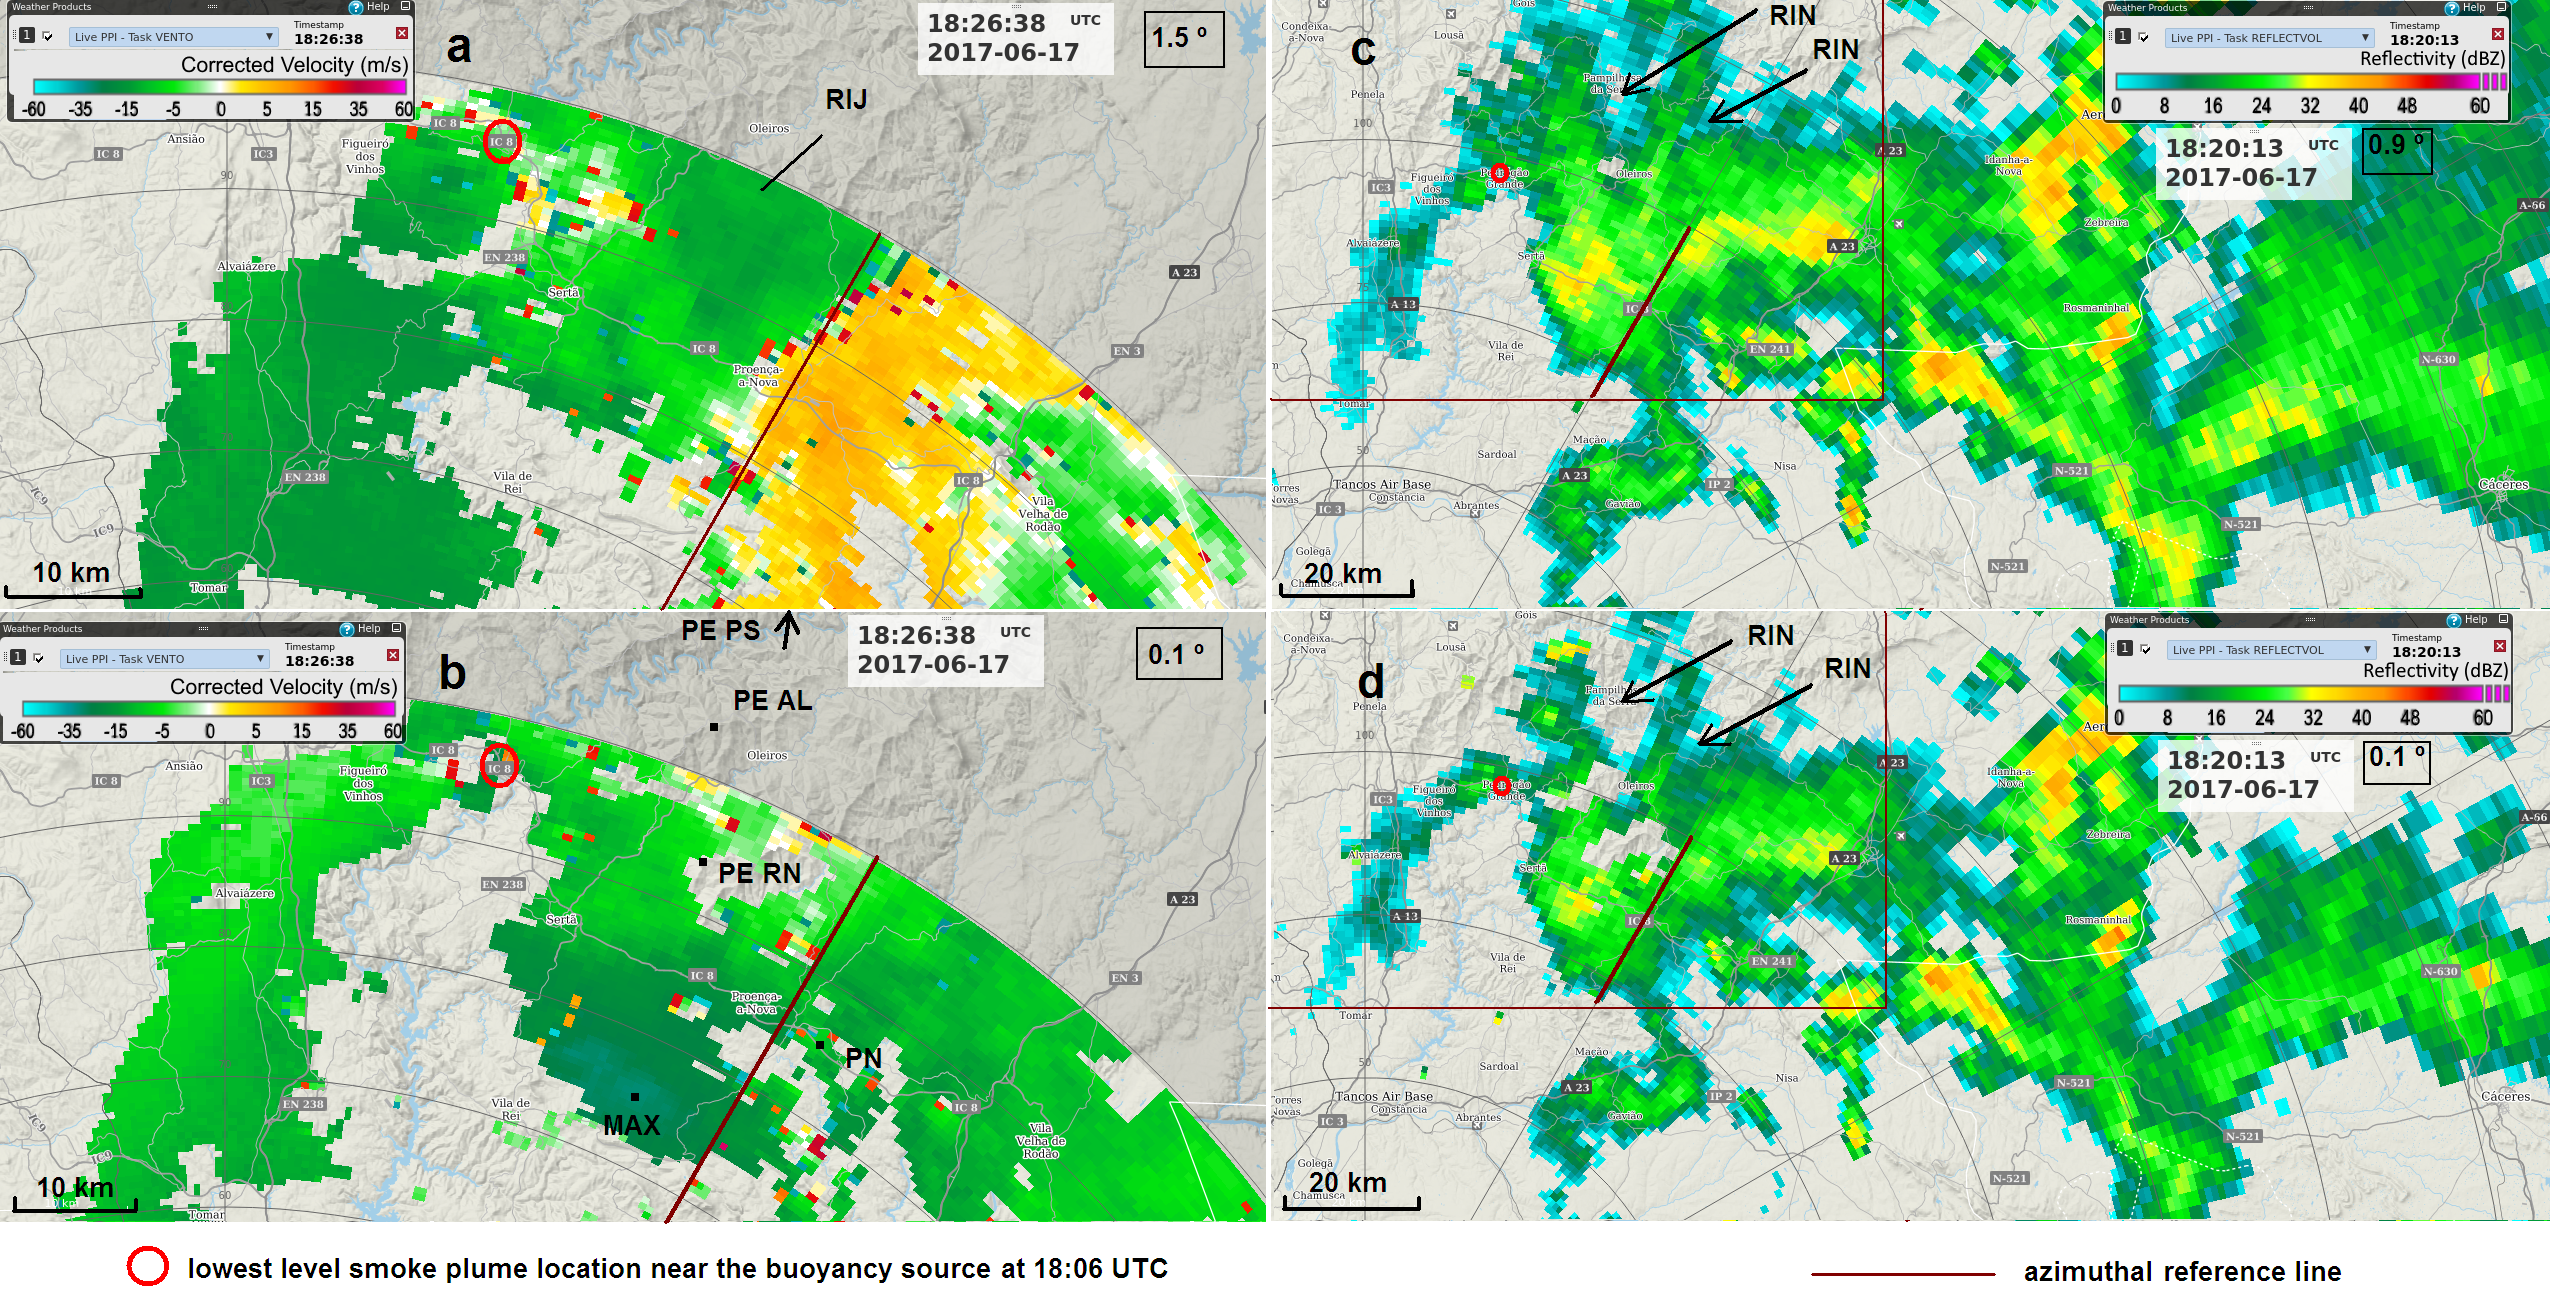

Supplement: s1 [file s1 › Figure S16.PNG]

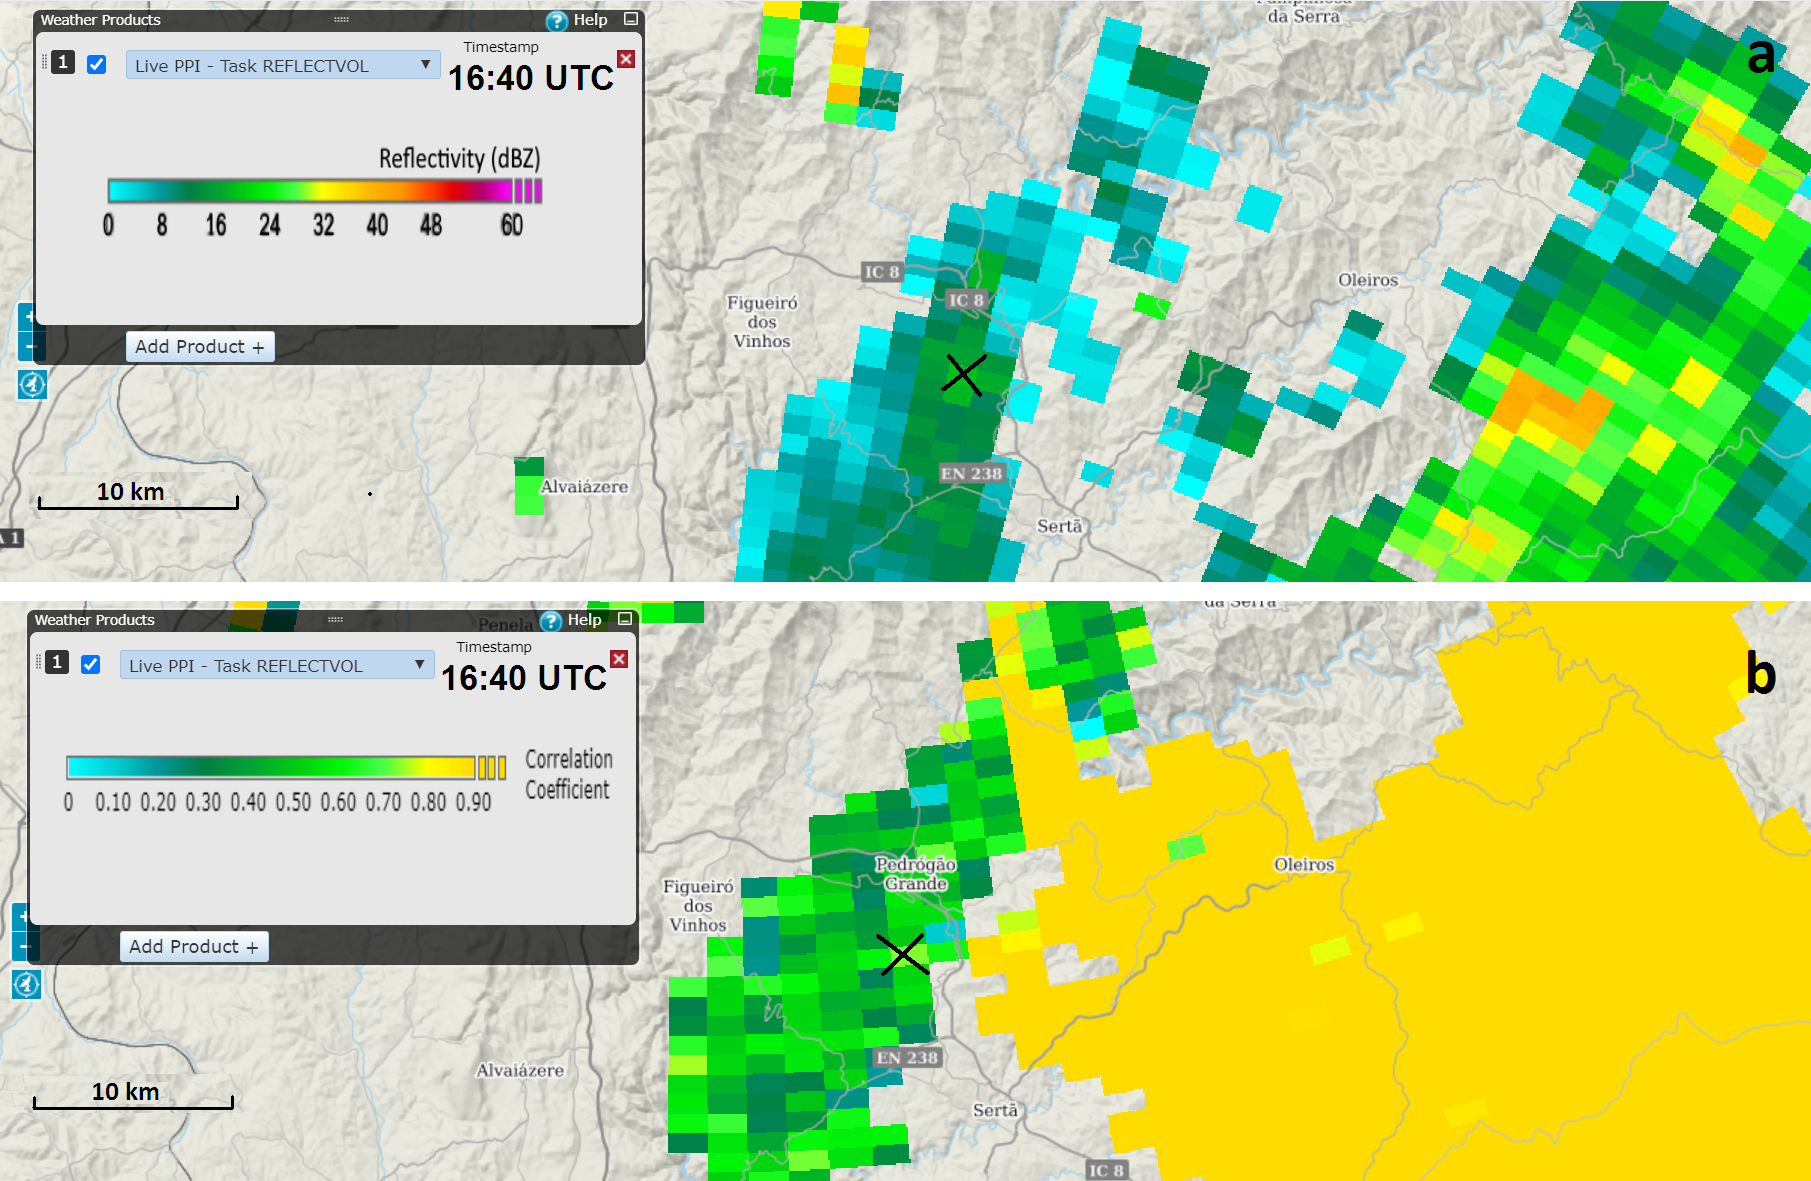

Supplement: s1 [file s1 › Figure S17.PNG]

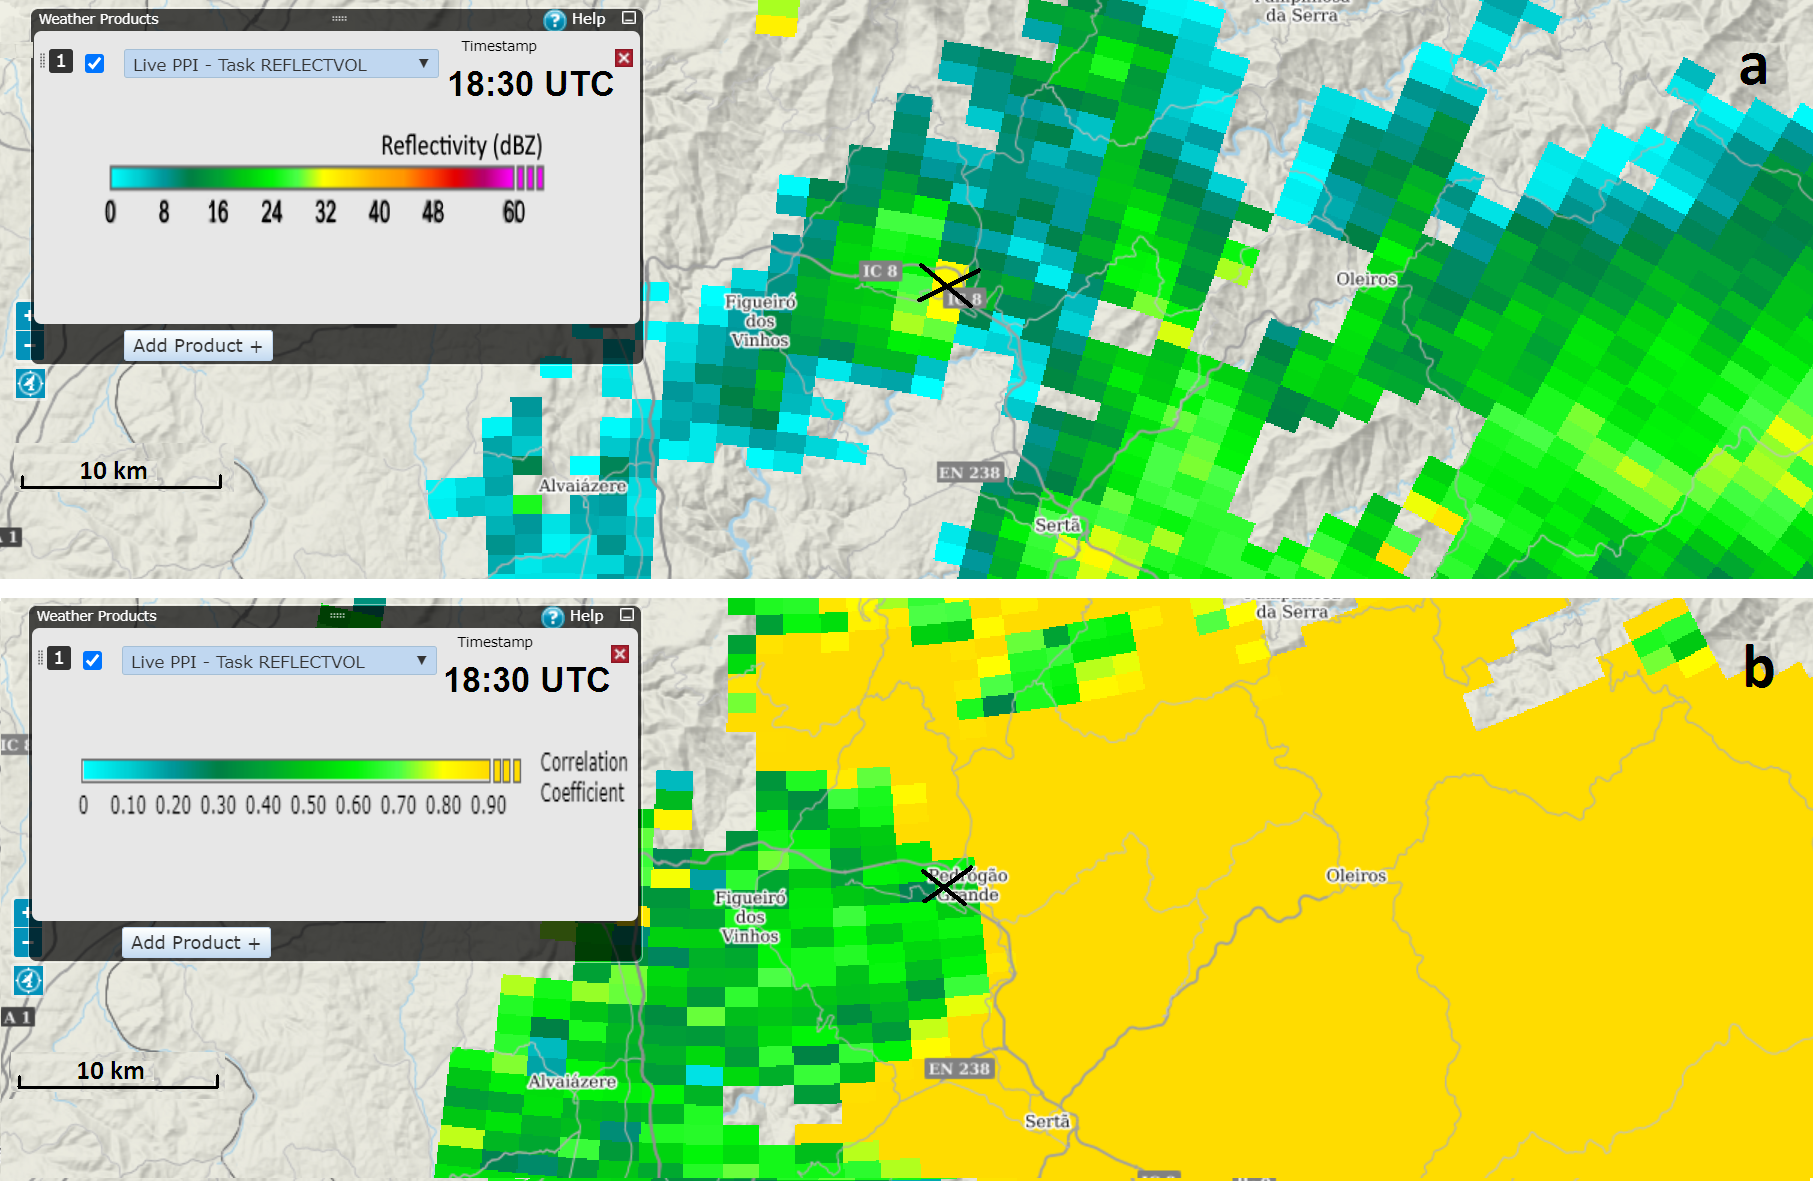

Supplement: s1 [file s1 › Figure S18.PNG]

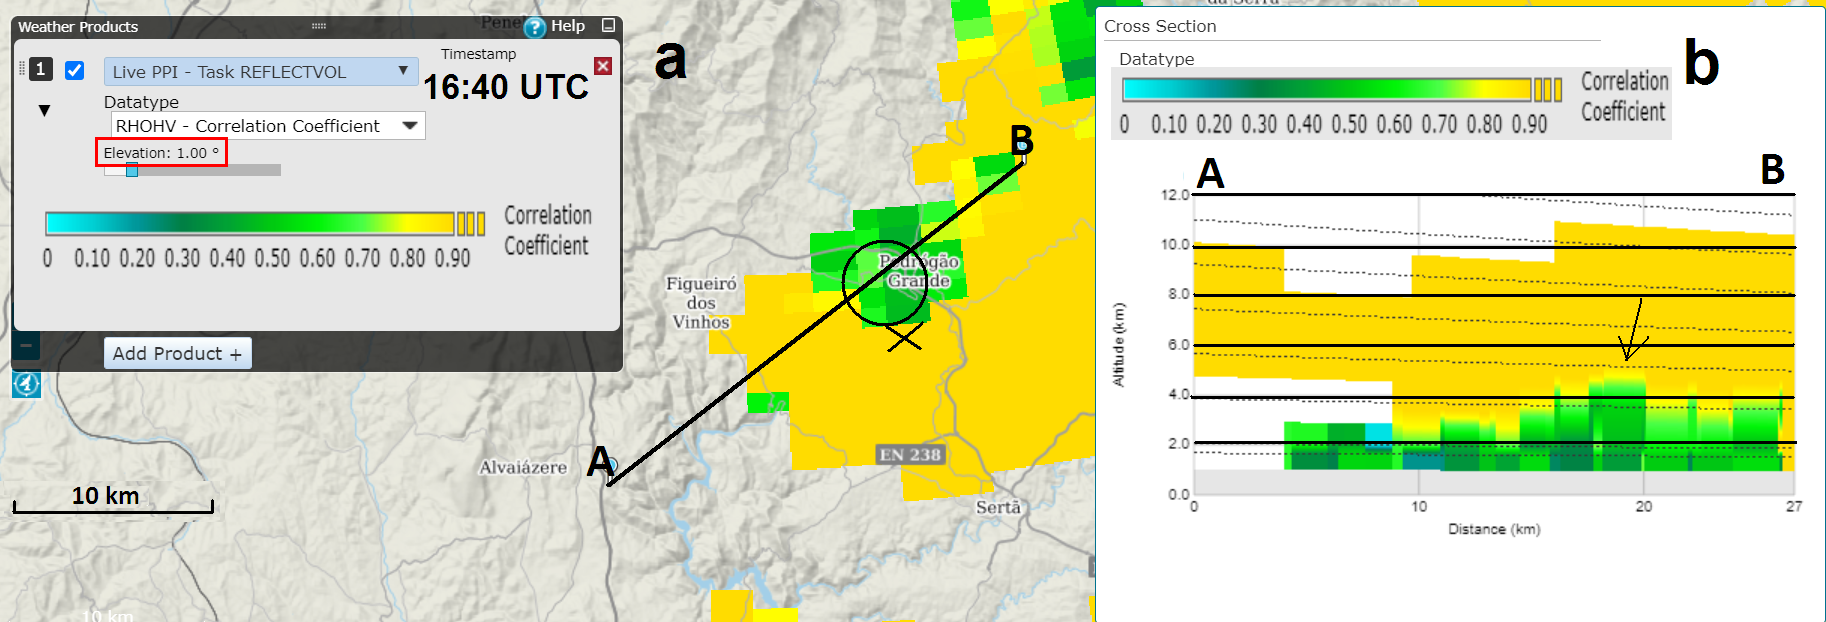

Supplement: s1 [file s1 › Figure S19.png]

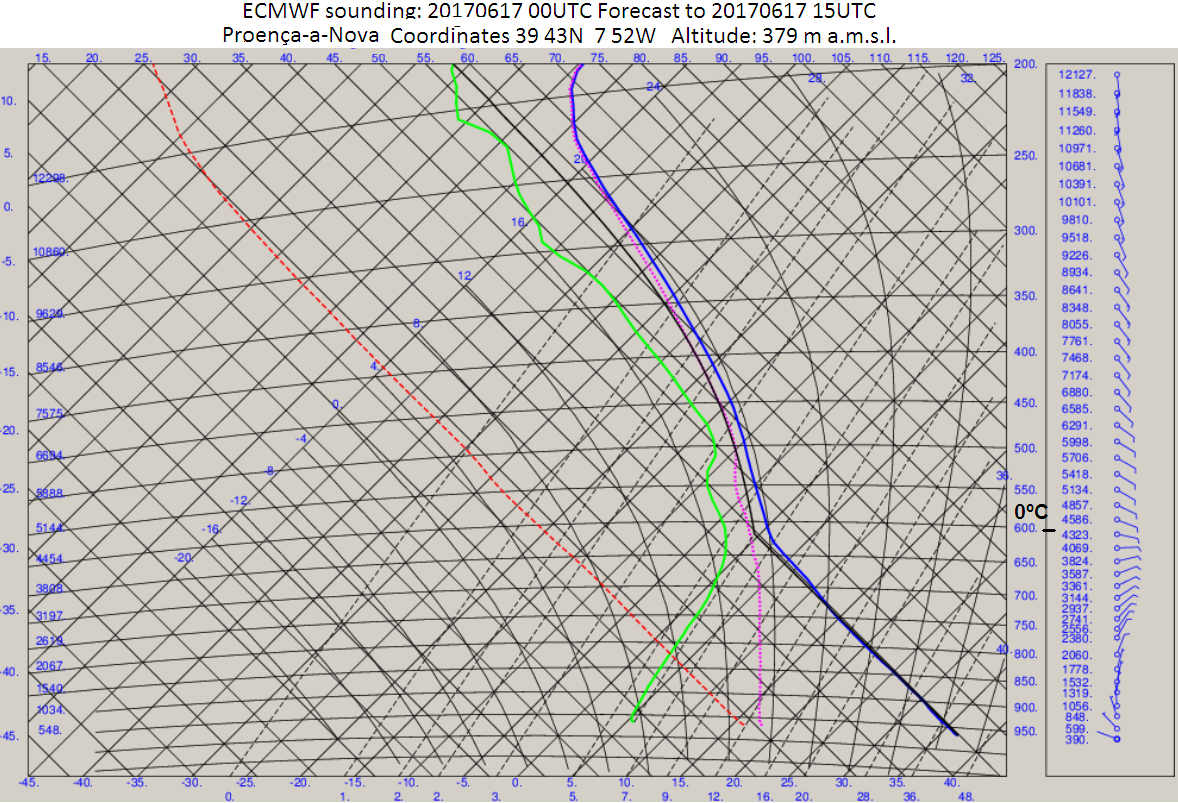

Supplement: s1 [file s1 › Figure S2.PNG]

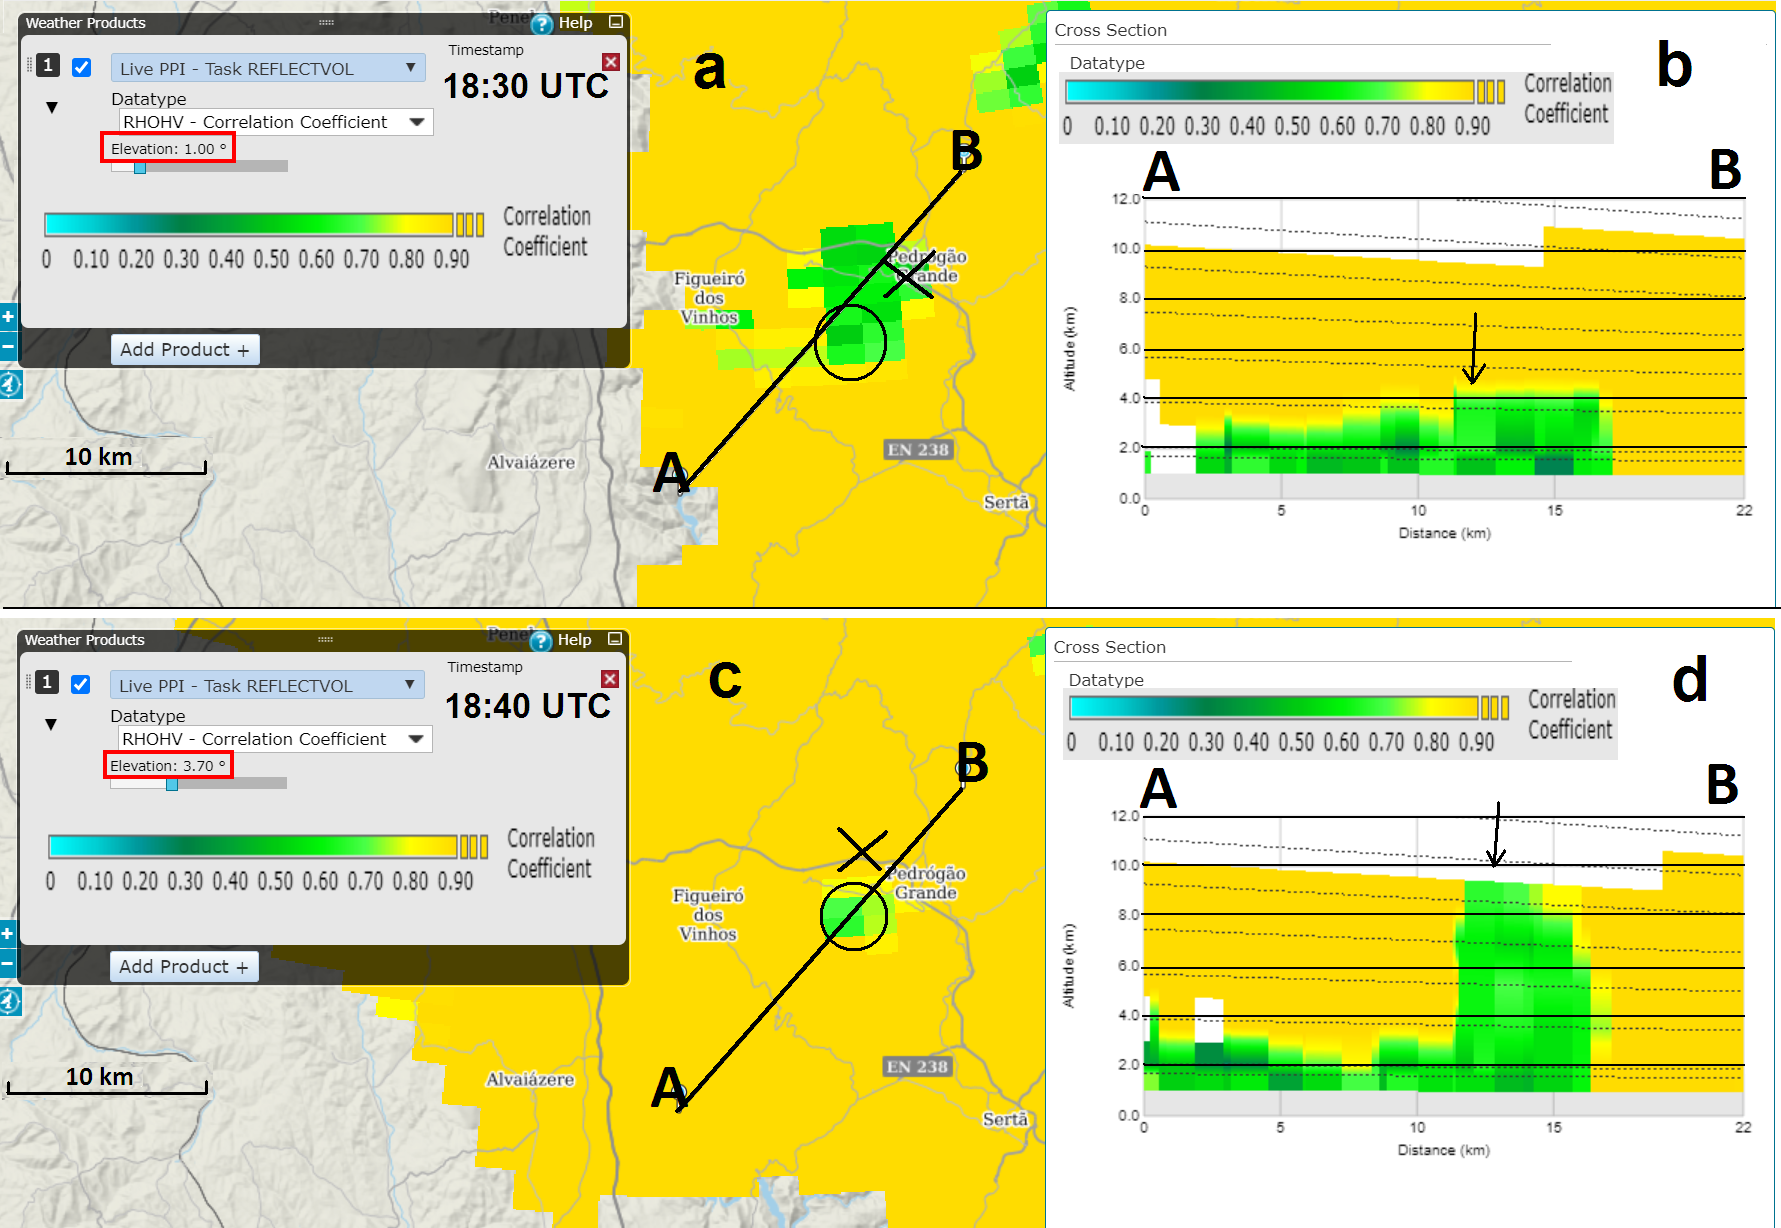

Supplement: s1 [file s1 › Figure S20.PNG]

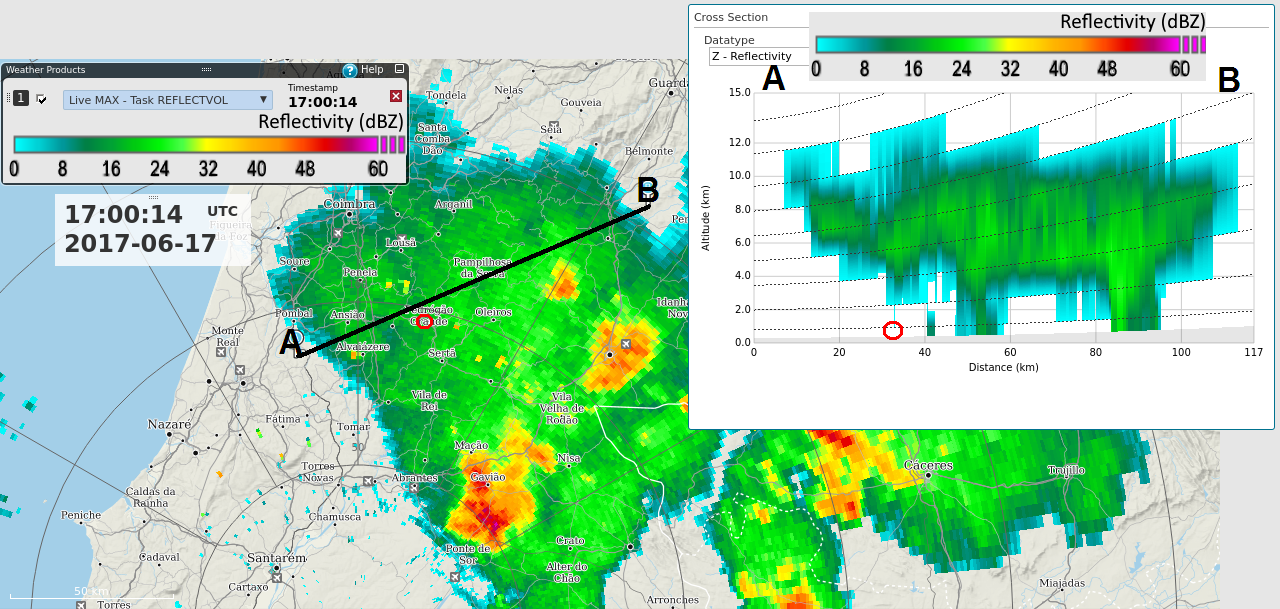

Supplement: s1 [file s1 › Figure S21.png]

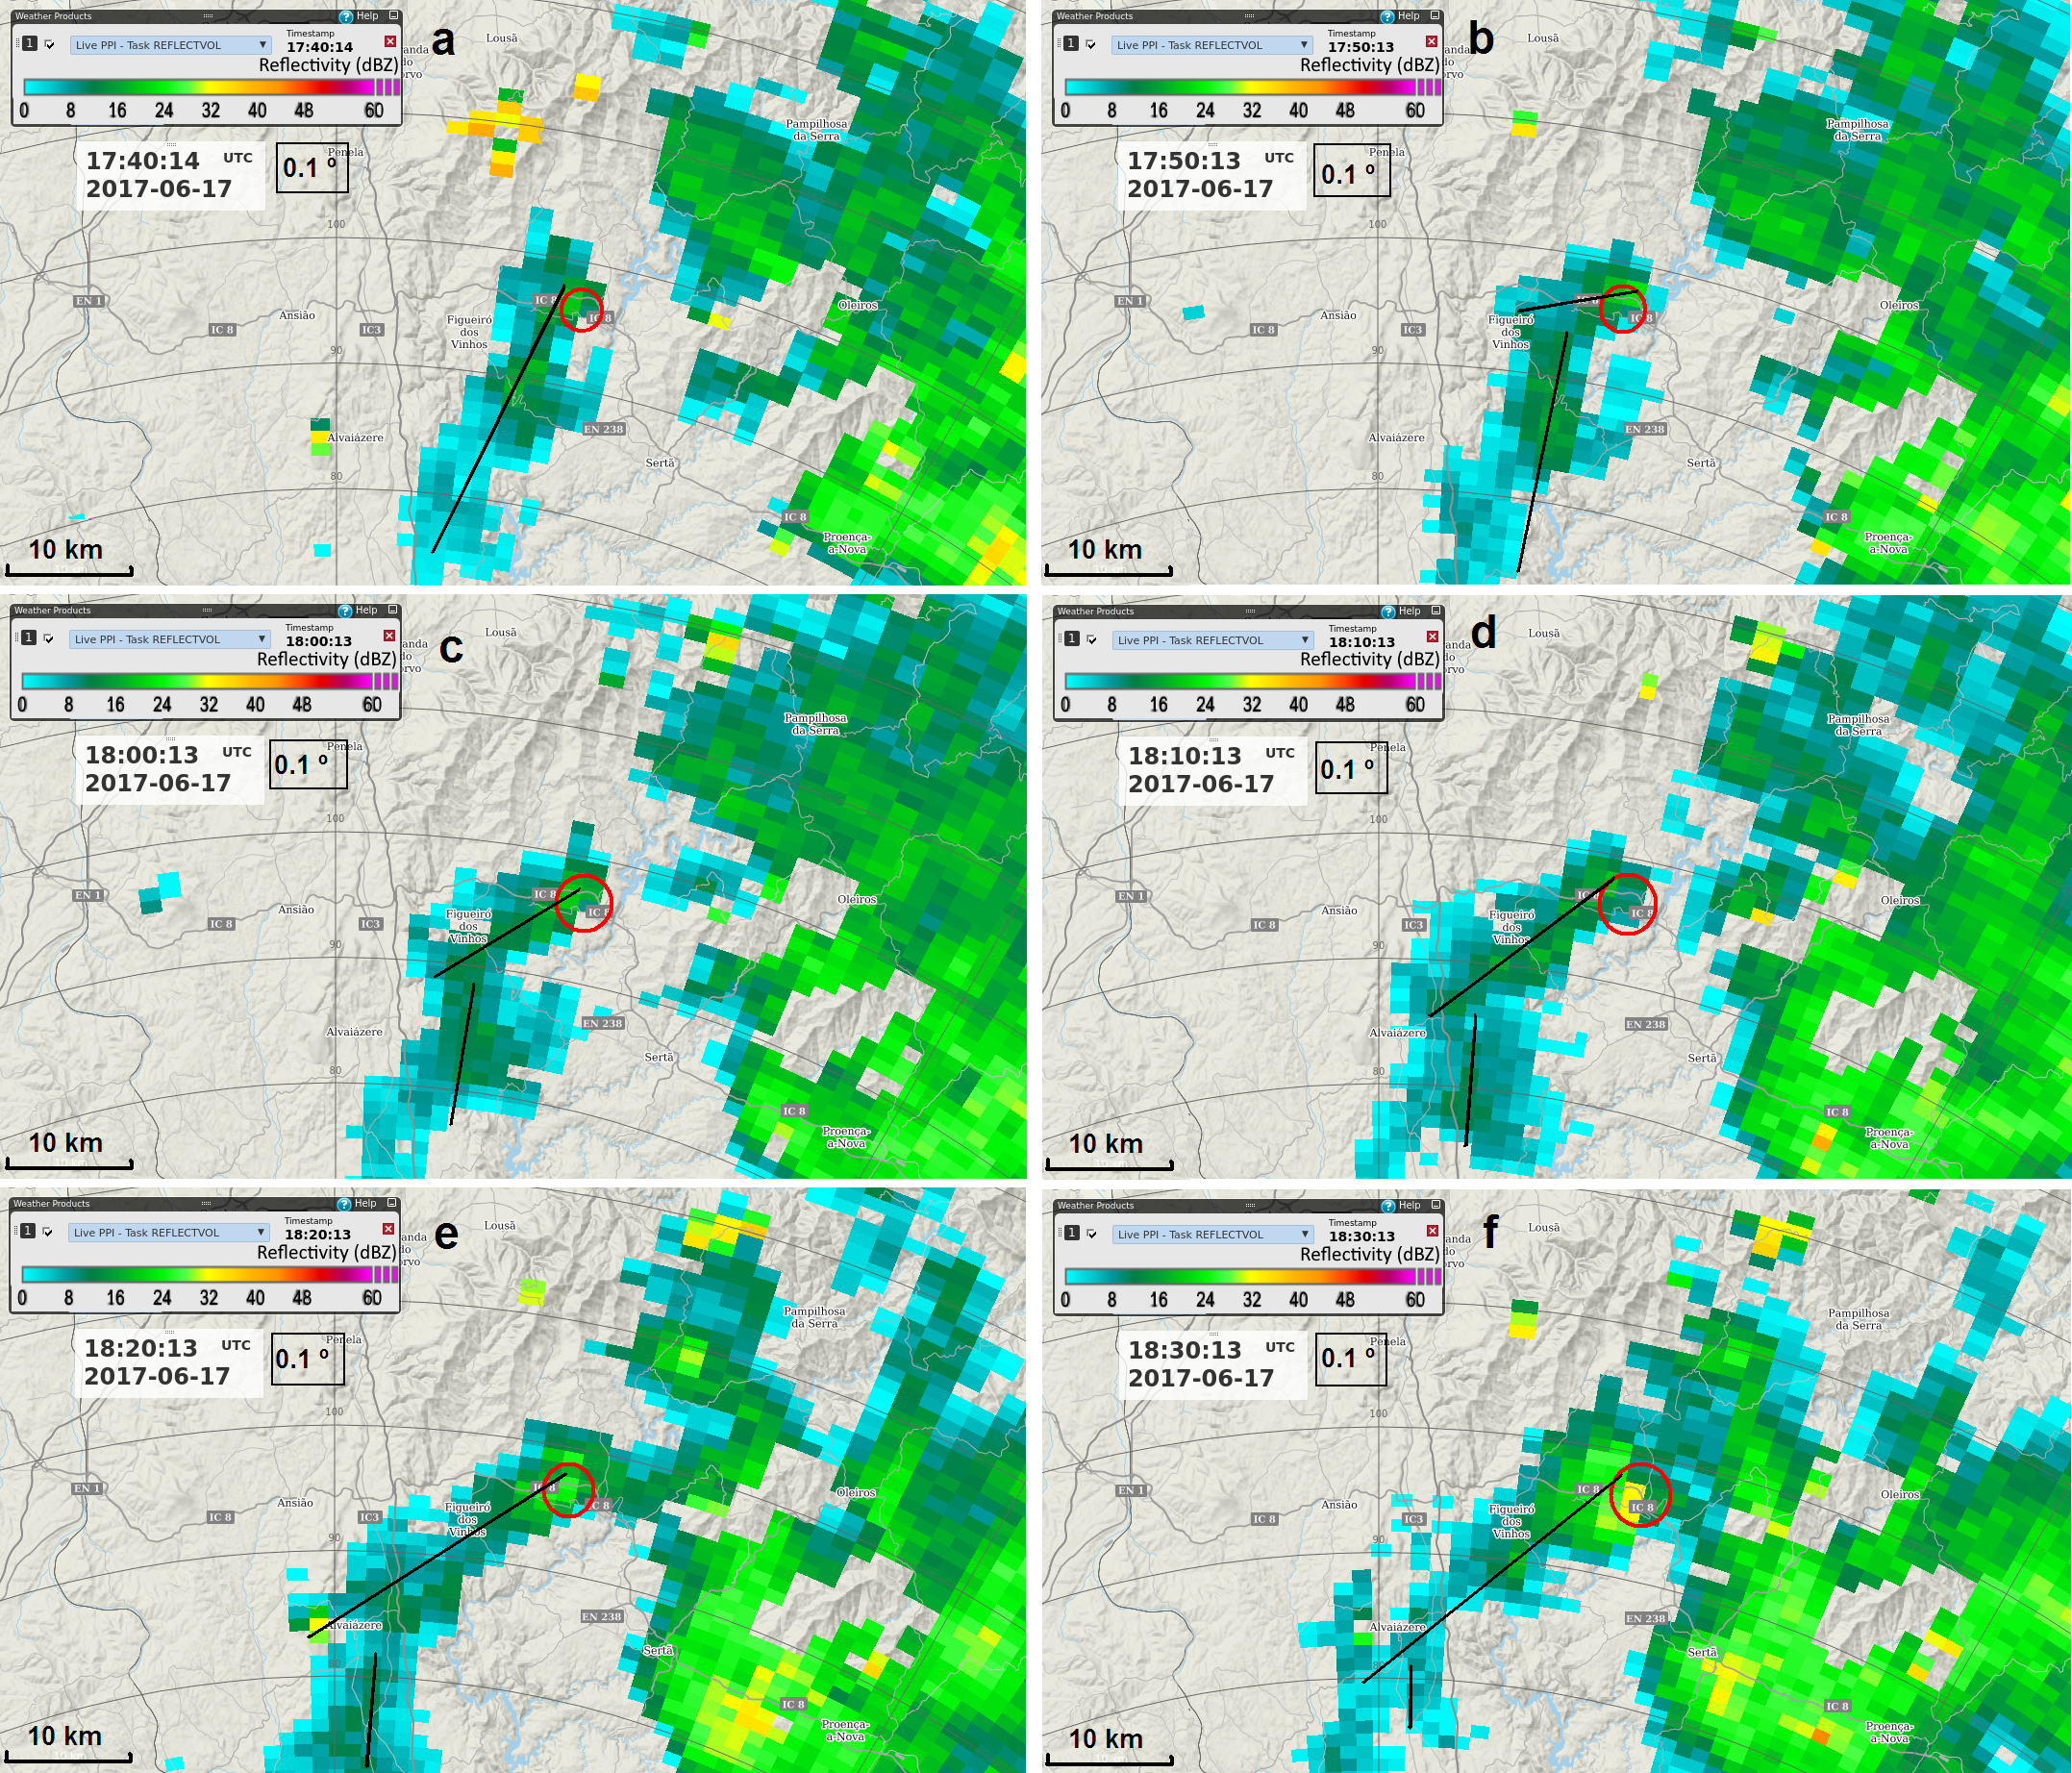

Supplement: s1 [file s1 › Figure S22.PNG]

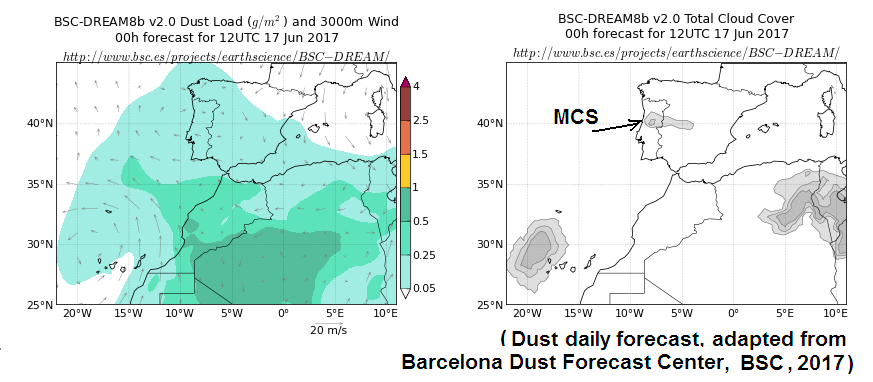

Supplement: s1 [file s1 › Figure S23.PNG]

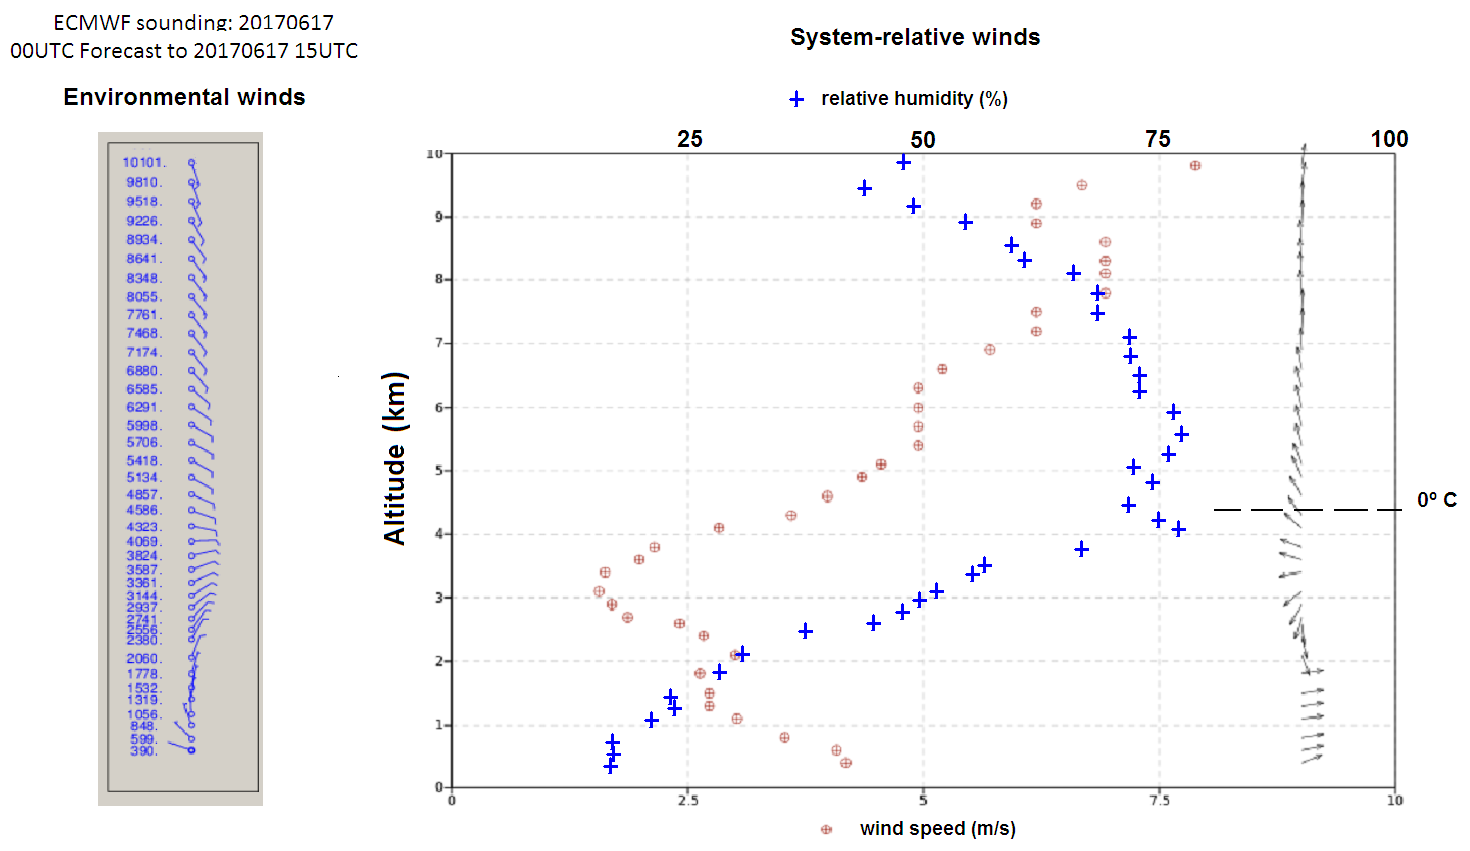

Supplement: s1 [file s1 › Figure S3.PNG]

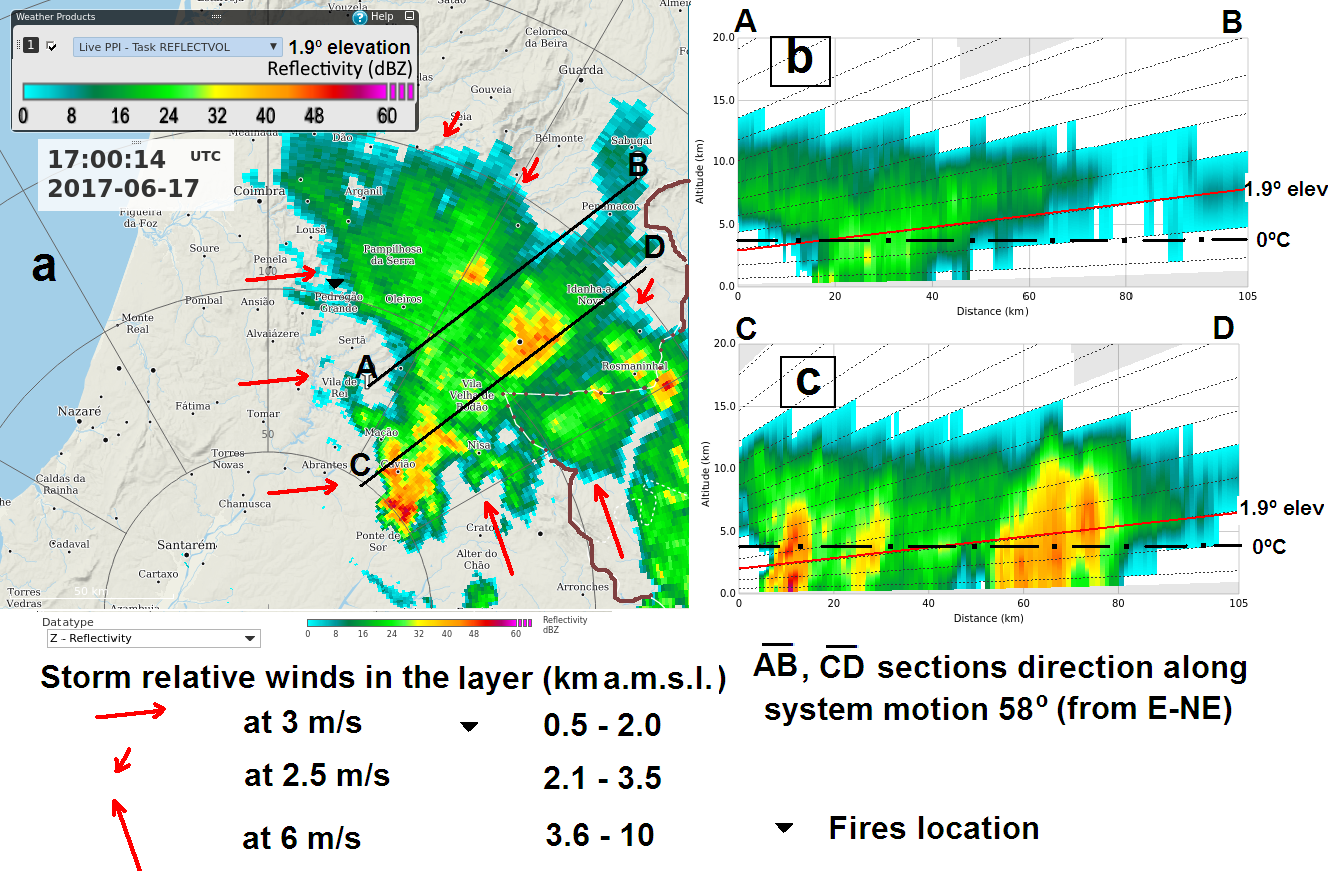

Supplement: s1 [file s1 › Figure S4.PNG]

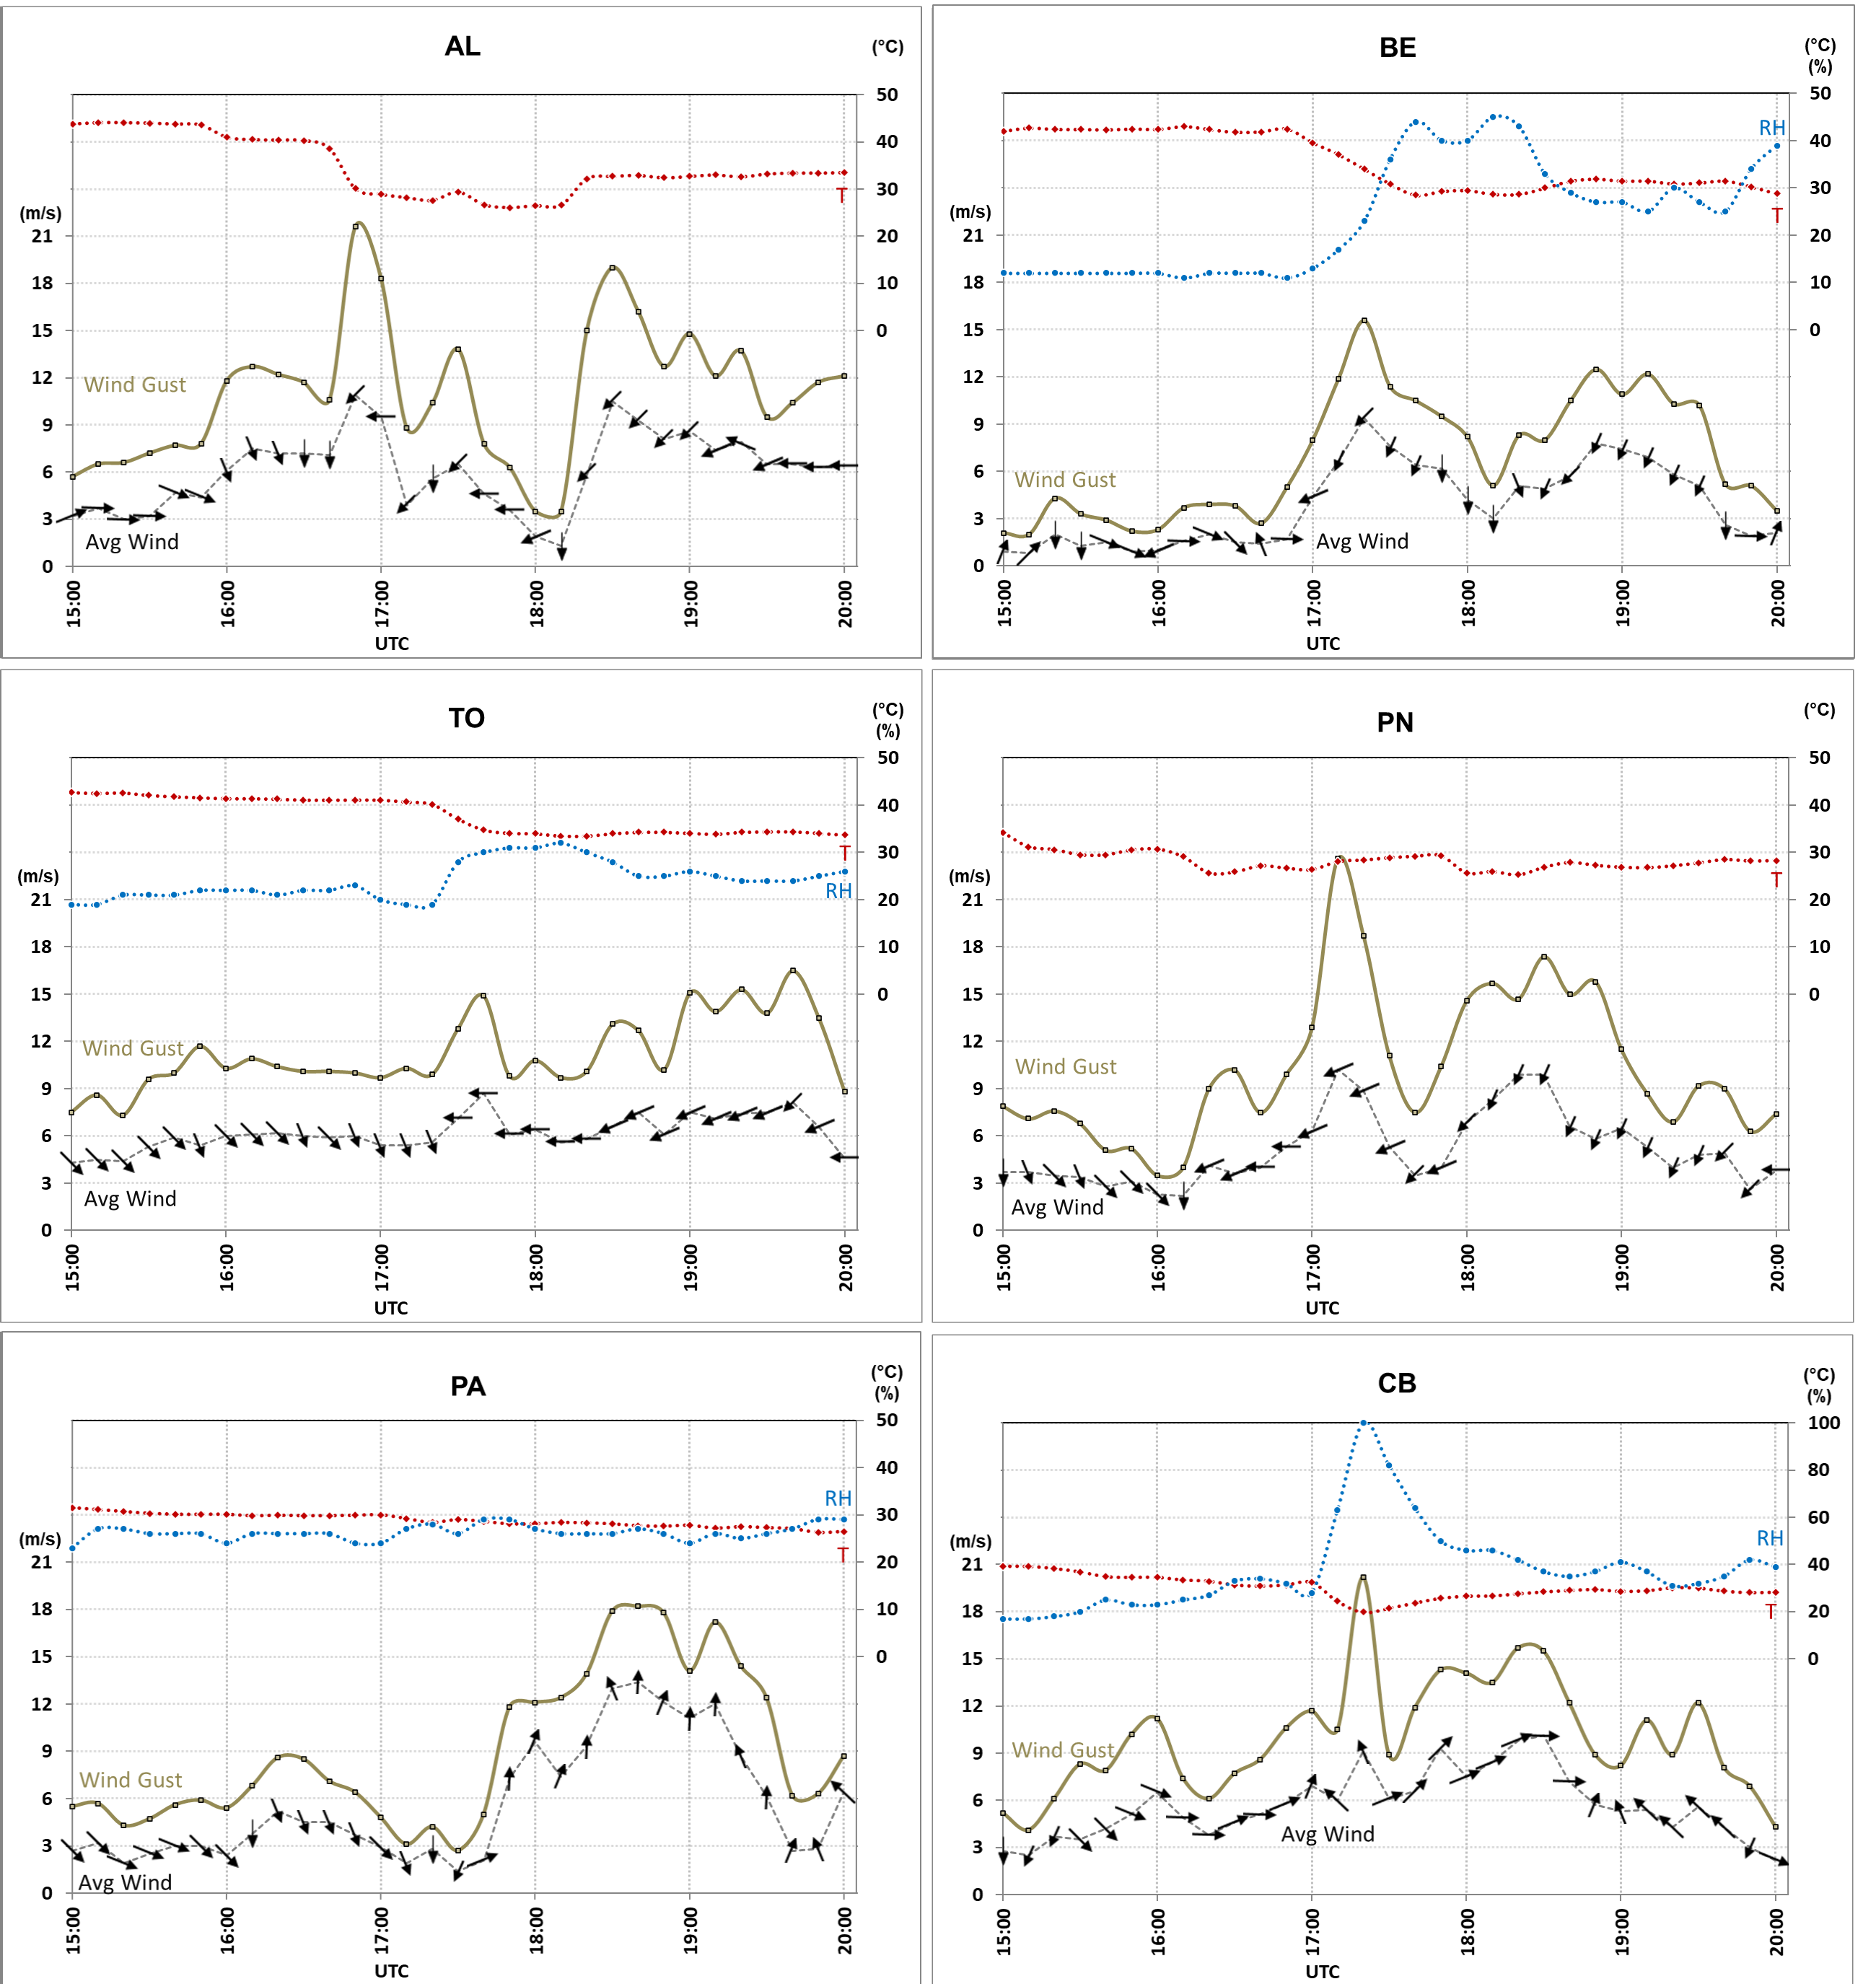

Supplement: s1 [file s1 › Figure S6.png]

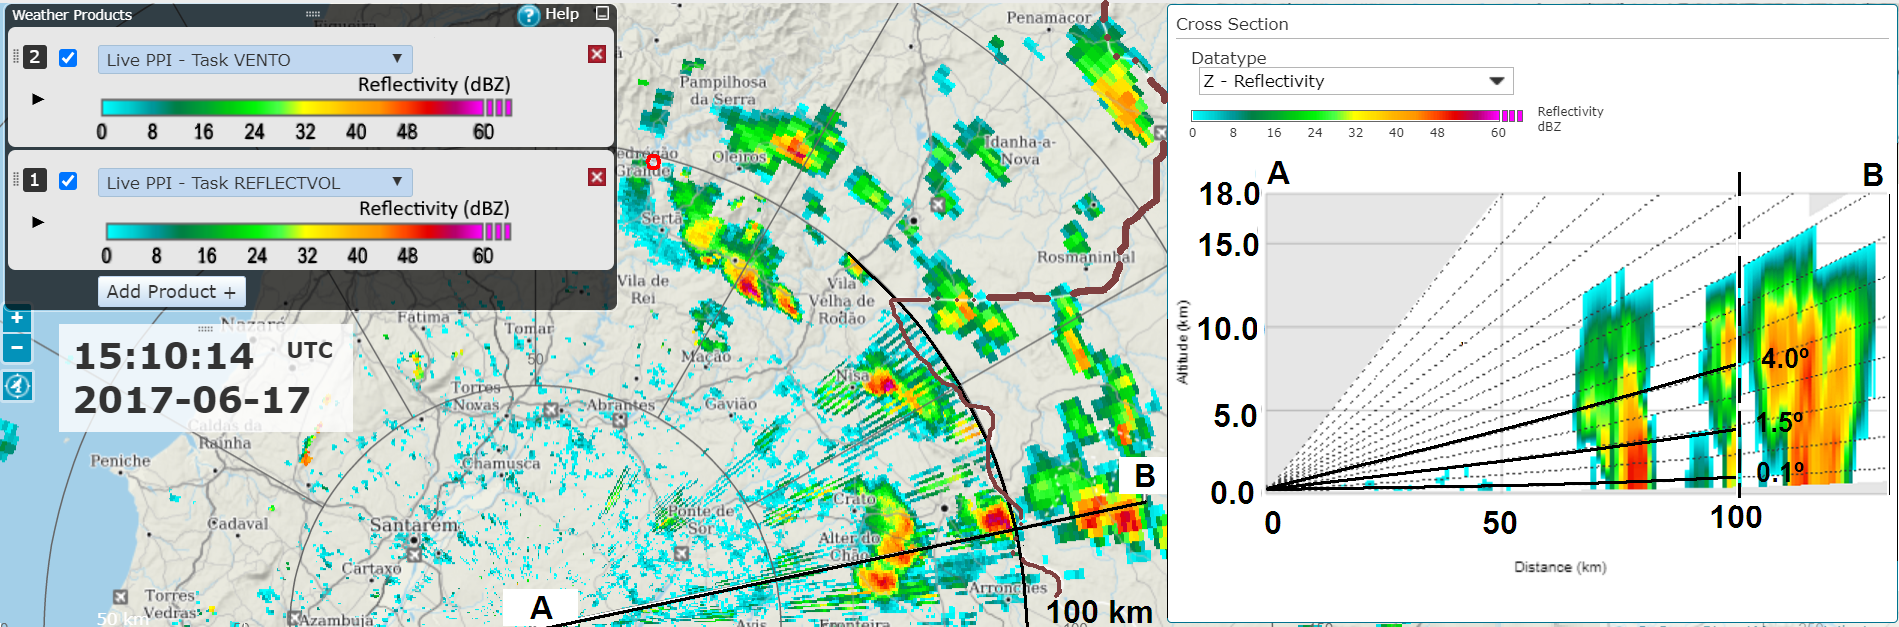

Supplement: s1 [file s1 › Figure S7.PNG]

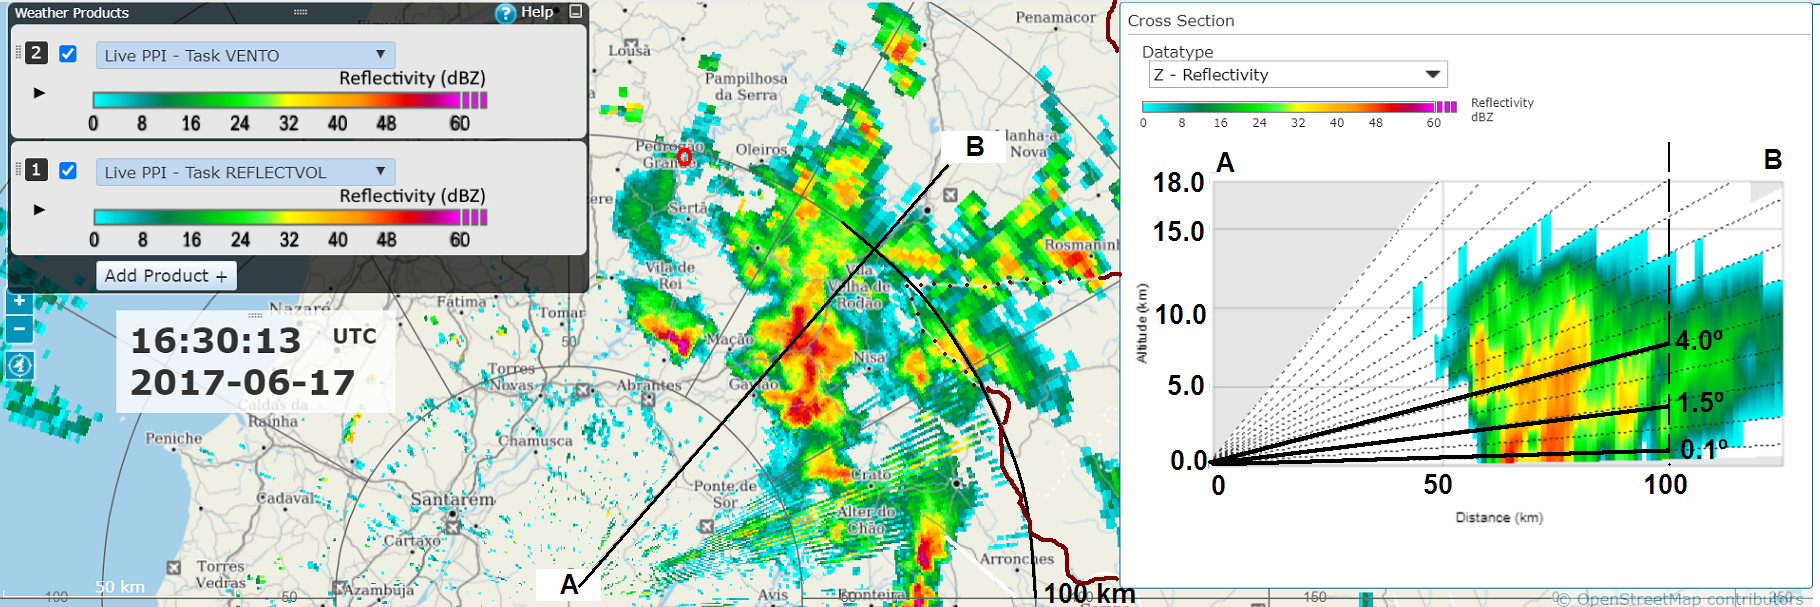

Supplement: s1 [file s1 › Figure S8.PNG]

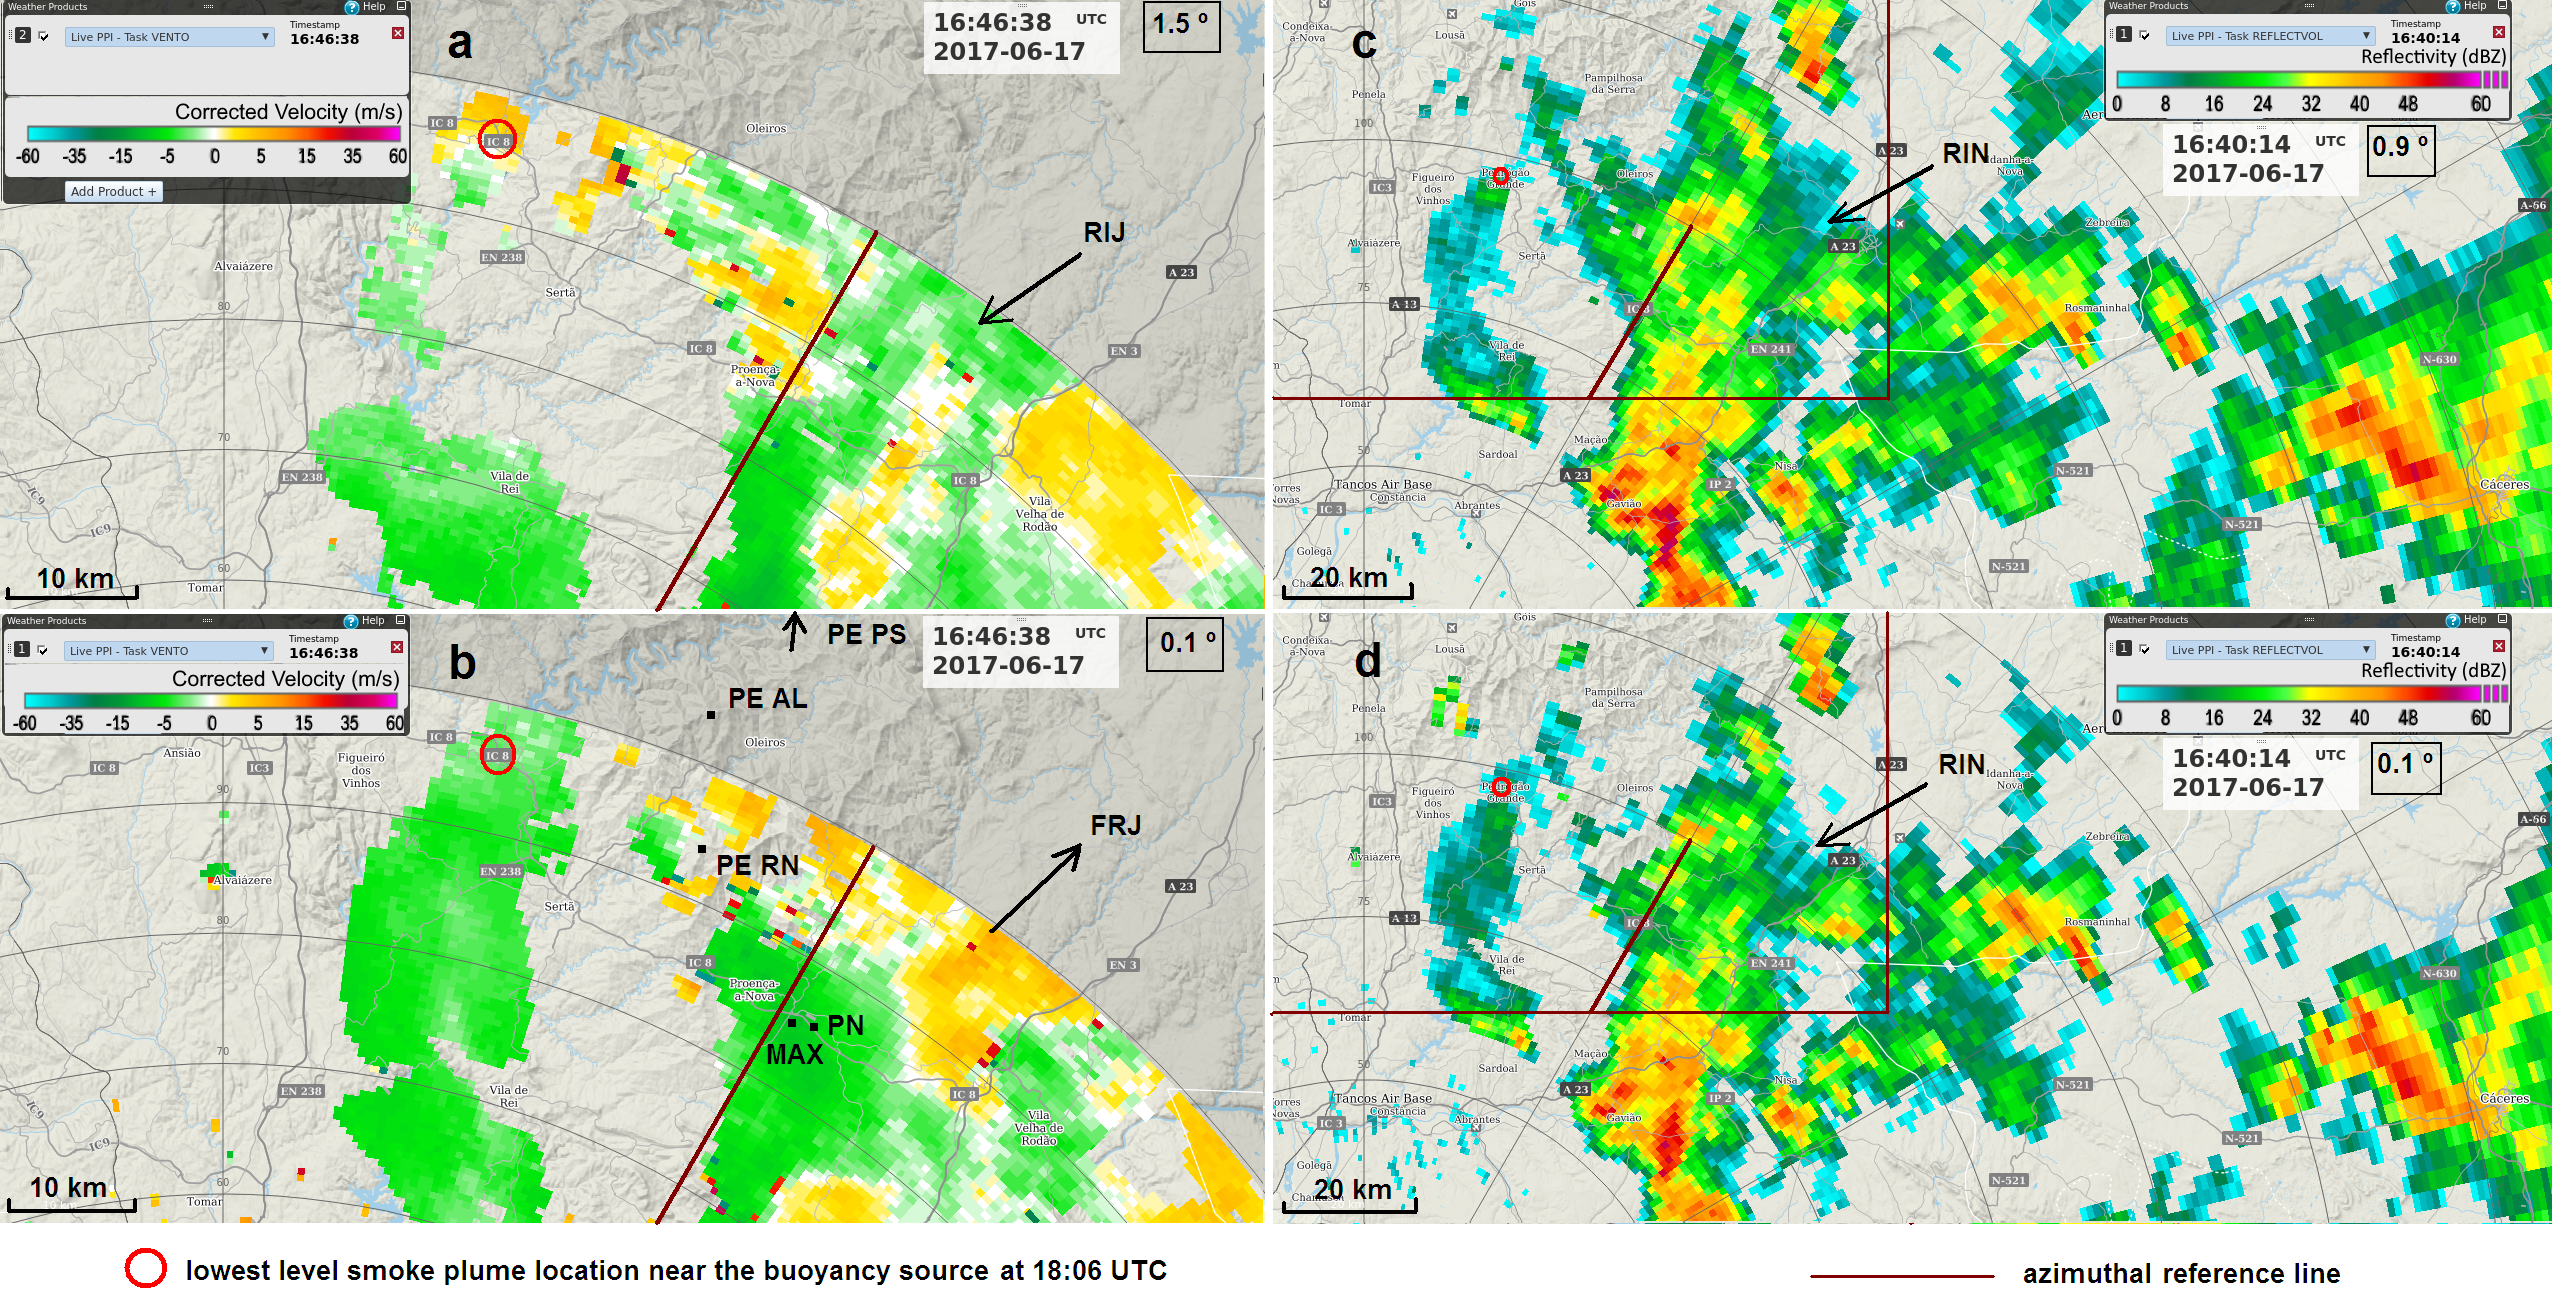

Supplement: s1 [file s1 › Figure S9.PNG]
